1     **Remdesivir and GS-441524 retain antiviral activity against Delta, Omicron,**  
2                   **and other emergent SARS-CoV-2 variants**

3  
4     Jared Pitts<sup>1</sup>, Jiani Li<sup>1</sup>, Jason K. Perry<sup>1</sup>, Venice Du Pont<sup>1</sup>, Nicholas Riola<sup>1</sup>, Lauren Rodriguez<sup>1</sup>,  
5     Xianghan Lu<sup>1</sup>, Chaitanya Kurhade<sup>2</sup>, Xuping Xie<sup>2</sup>, Gregory Camus<sup>1</sup>, Savrina Manhas<sup>1</sup>, Ross  
6     Martin<sup>1</sup>, Pei-Yong Shi<sup>2</sup>, Tomas Cihlar<sup>1</sup>, Danielle P. Porter<sup>1</sup>, Hongmei Mo<sup>1</sup>, Evguenia Maiorova<sup>1</sup>,  
7     John P. Bilello<sup>1\*</sup>

8

9     **Affiliations:**

10    <sup>1</sup>Gilead Sciences, Inc. 333 Lakeside Drive, Foster City, CA 94404.

11    <sup>2</sup>Department of Biochemistry and Molecular Biology, University of Texas Medical Branch, 301  
12    University Boulevard, Galveston, TX 77550

13    \*To whom correspondence should be addressed: [john.bilello@gilead.com](mailto:john.bilello@gilead.com).

14

15    **Abstract**

16    Genetic variation of SARS-CoV-2 has resulted in the emergence and rapid spread of multiple  
17    variants throughout the pandemic, of which Omicron is currently the predominant variant  
18    circulating worldwide. SARS-CoV-2 variants of concern or interest (VOC/VOI) have evidence  
19    of increased viral transmission, disease severity, or decreased effectiveness of vaccines and  
20    neutralizing antibodies. Remdesivir (RDV, VEKLURY<sup>®</sup>) is a nucleoside analog prodrug and the  
21    first FDA-approved antiviral treatment of COVID-19. Here we present a comprehensive antiviral  
22    activity assessment of RDV and its parent nucleoside, GS-441524, against 10 current and former  
23    SARS-CoV-2 VOC/VOI clinical isolates by nucleoprotein ELISA and plaque reduction assay.

24 Delta and Omicron variants remained susceptible to RDV and GS-441524, with EC<sub>50</sub> values 0.31  
25 to 0.62-fold of those observed against the ancestral WA1 isolate. All other tested variants  
26 exhibited EC<sub>50</sub> values ranging from 0.15 to 2.3-fold of the observed EC<sub>50</sub> values against WA1.  
27 Analysis of nearly 6 million publicly available variant isolate sequences confirmed that Nsp12,  
28 the RNA-dependent RNA polymerase (RdRp) target of RDV and GS-441524, is highly  
29 conserved across variants with only 2 prevalent changes (P323L and G671S). Using recombinant  
30 viruses, both RDV and GS-441524 retained potency against all viruses containing frequent  
31 variant substitutions or their combination. Taken together, these results highlight the conserved  
32 nature of SARS-CoV-2 Nsp12 and provide evidence of sustained SARS-CoV-2 antiviral activity  
33 of RDV and GS-441524 across the tested variants. The observed pan-variant activity of RDV  
34 supports its continued use for the treatment of COVID-19 regardless of the SARS-CoV-2  
35 variant.

36 **Keywords:** remdesivir, GS-441524, Nsp12, SARS-CoV-2 variants, COVID-19, antiviral

## 37 **1. Introduction**

38 Since the emergence of severe acute respiratory syndrome coronavirus 2 (SARS-CoV-2) in late  
39 2019, two lineages, numerous variants, and subvariants have been detected through genomic  
40 surveillance. As with other coronaviruses, SARS-CoV-2 variants emerge through inter- and  
41 intramolecular recombination and from heritable errors generated in the viral genome by its  
42 error-prone RNA-dependent RNA polymerase (RdRp) (1, 2). Retention of genetic changes in a  
43 viral genome may be linked to advantages in replication fitness and/or in overcoming selective  
44 pressures exerted by the host immune system, an antiviral, or a therapeutic neutralizing antibody.  
45 Naturally occurring SARS-CoV-2 variants can be categorized as variants of concern (VOC) or  
46 interest (VOI) by the World Health Organization (WHO) or Centers for Disease Control and

47 Prevention (CDC) based on evidence of increased rates of transmission and disease severity,  
48 detection failures, or potential loss in susceptibility to current vaccines and neutralizing  
49 antibodies. The early ancestral A lineage isolates detected in Wuhan, China and Seattle, WA  
50 (WA1 strain) were rapidly replaced worldwide by the B lineage VOC Alpha in 2020 (3).  
51 Subsequently, multiple VOIs and dominant VOCs of the B lineage progressively emerged, with  
52 Delta and most recently Omicron completely replacing prior strains (4-6). The defining genetic  
53 changes that differentiate variants predominantly occur in the gene encoding the spike protein,  
54 which mediates virus binding, fusion, and entry. However, changes are also detected elsewhere  
55 in the viral genomes, resulting in infrequent amino acid substitutions in the Nsp5 3CL main  
56 protease (Mpro) and Nsp12 RdRp, the two targets of currently approved SARS-CoV-2 antivirals.  
57 Remdesivir (RDV; VEKLURY<sup>®</sup>) (7) was the first antiviral approved for the treatment of patients  
58 hospitalized with COVID-19 based on evidence that RDV treatment significantly reduced  
59 recovery times in clinical trials (8-10). Further, in the PINETREE clinical trial, in which RDV  
60 was administered in an outpatient setting, RDV reduced COVID-19 related hospitalization and  
61 death by 87% (11). These results led to an expanded FDA approval of RDV for high-risk non-  
62 hospitalized individuals with COVID-19 symptoms (12).

63 RDV is a nucleotide mono-phosphoramidate prodrug of the parent nucleoside GS-441524 (13).  
64 Following IV administration, RDV is metabolized intracellularly to the active triphosphate  
65 metabolite (RDV-TP), effectively bypassing the rate-limiting first phosphorylation step of GS-  
66 441524. RDV-TP then competes efficiently with cellular ATP for incorporation into the nascent  
67 SARS-CoV-2 viral RNA, resulting in cessation of strand-synthesis by two separate mechanisms  
68 of action (14, 15). Prior to the emergence of SARS-CoV-2, RDV and its parent nucleoside GS-  
69 441524 were shown to inhibit multiple RNA viruses (16-18), including a broad spectrum of

70 coronaviruses such as SARS-CoV, Middle Eastern respiratory syndrome coronavirus (MERS-  
71 CoV), mouse hepatitis virus (MHV), and other zoonotic coronaviruses (19-22). Additionally,  
72 potent antiviral activity of RDV was observed in primary lung cells *in vitro* and confirmed *in*  
73 *vivo* across multiple respiratory viruses including respiratory syncytial virus (RSV) (18), Nipah  
74 (23), SARS-CoV (20), and MERS-CoV (22).

75 The RdRp catalytic active site is nearly 100% conserved among coronaviruses, therefore the  
76 observed potency of RDV against other coronaviruses was anticipated to translate to SARS-  
77 CoV-2 antiviral activity (21). RDV and GS-441524 have both demonstrated potency against  
78 SARS-CoV-2, with *in vitro* cellular EC<sub>50</sub> values ranging from 10 to 120 nM for RDV and 470 to  
79 3600 nM for GS-441524 (13, 24-27). The *in vivo* efficacy of RDV has been demonstrated in  
80 SARS-CoV-2 challenge studies in mice and hamsters (13, 28, 29). Additionally, RDV efficacy  
81 was demonstrated in non-human primates following several different routes of administration  
82 including IV, SC, and inhalation (30-32).

83 The low sequence diversity and high genetic stability of the SARS-CoV-2 RNA replication  
84 complex, including the Nsp12 RdRp, observed over time indicates a minimal global risk of pre-  
85 existing resistance to RDV (33). However, the emergence of each new variant brings a risk of  
86 altered susceptibility to vaccine-induced immunity, therapeutic antibodies, or antivirals. In this  
87 report, we demonstrate that *in vitro* potencies of RDV and GS-441524 are preserved among the  
88 known prominent SARS-CoV-2 variants as well as against recombinant viruses harboring  
89 specific substitutions frequently observed in variant Nsp12.

90

## 91 2. Results

### 92 *Antiviral activity of RDV and GS-441524 against clinical isolates of SARS-CoV-2 variants*

93 *In vitro* RDV antiviral activity was assessed against clinical isolates of an extensive panel of past  
94 and present SARS-CoV-2 VOC/VOIs (Supplemental Table 1). Antiviral activity was initially  
95 assessed utilizing a plaque reduction assay (PRA) from culture supernatants harvested at 48  
96 hours post-infection (hpi) from A549-ACE2-TMPRSS2 cultures infected with variants at an  
97 MOI of 0.1. The average RDV EC<sub>50</sub> value for the WA1 reference strain by PRA was 98 ± 48  
98 nM, while variant EC<sub>50</sub> values ranged from 15 to 154 nM, representing 0.15- to 1.6-fold changes  
99 relative to WA1 (Table 1 and Fig. 1A). These results indicate that RDV retains potent antiviral  
100 activity against all variants evaluated by PRA, including the Delta variant, which was ~3-fold  
101 more susceptible to RDV than the WA1 isolate.

102 To assess the antiviral effect directly in infected cultures, antiviral testing based on the  
103 nucleoprotein (N) enzyme-linked immunoassay (ELISA) was developed and conducted in  
104 addition to PRA. The EC<sub>50</sub> of RDV against the WA1 reference strain by ELISA was 110 ± 42  
105 nM (Table 1 and Fig. 1B), indicating that antiviral potency of RDV is consistent between PRA  
106 and ELISA. Variants tested in ELISA had average RDV EC<sub>50</sub> values ranging from 70 to 258 nM  
107 with observed fold EC<sub>50</sub> changes from 0.59 to 2.33 (Table 1 and Fig. 1B). Due to the low signal  
108 observed with the Omicron variant at the standard 48 h timepoint, likely stemming from the  
109 reduced *in vitro* replication efficiency of Omicron (34), the assay was extended to 72 h and  
110 compared with WA1 assessed at the same timepoint. The WA1 reference isolate at 72 hpi had an  
111 average RDV EC<sub>50</sub> of 97 ± 15 nM. Thus, delaying the readout to 72 hpi had no effect on the  
112 observed potency of RDV. The Omicron variant was significantly more susceptible to RDV with  
113 an average EC<sub>50</sub> value of 44 ± 16 nM (p≤0.0001), a 0.45-fold change compared to WA1.

114 The potency of GS-441524, the parent nucleoside of RDV, was also unchanged against all  
115 variants and the WA1 reference isolate, as measured by ELISA at 48 hpi. The EC<sub>50</sub> of GS-  
116 441524 at this timepoint against WA1 was 5600 ± 4100 nM and ranged from 2100 to 8790 nM  
117 (0.53- to 1.43-fold change from WA1) against the collection of SARS-CoV-2 variants (Table 1,  
118 Fig. 1C). In agreement with the findings for RDV, GS-441524 was also found to be significantly  
119 ( $p \leq 0.0001$ ) more potent against Omicron than WA1 at 72 hpi, with EC<sub>50</sub> values of 3330 ± 1400  
120 compared to 6240 ± 1300 nM for WA1.

### 121 *Nsp12 sequence changes in SARS-CoV-2 variants*

122 To assess the genetic variation of Nsp12 in the 11 current or previously classified VOC/VOIs  
123 (Omicron, Delta, Alpha, Beta, Gamma, Epsilon, Zeta, Iota, Kappa, Lambda, and Mu), a total of  
124 5,842,948 SARS-CoV-2 variant sequences from the GISAID (Global Initiative on Sharing Avian  
125 Influenza Data) database were evaluated. The highest proportion of analyzed sequences were  
126 Delta variants (4,059,836; 69.5%), followed by Alpha variants (1,158,351; 19.8%) and Omicron  
127 variants (392,056; 6.7%); the other 8 variants made up the remaining 4.0% (Supplemental Table  
128 2). We further assessed the genetic variation in spike in comparison to Nsp12 across the variants.

129 The number of amino acid substitutions from WA1 viral isolate sequence in Nsp12 and spike  
130 was calculated for each of the 11 variants. Overall, 1 to 6 amino acid substitutions were observed  
131 across the different variants, with a frequency of  $\geq 1\%$  of sequences over the 932 amino acid  
132 positions in Nsp12 compared with a range of 7 to 45 substitutions over the 1274 amino acid  
133 positions in spike (Supplemental Fig. 1, Supplemental Tables 2 and 3). The most prevalent  
134 Nsp12 substitution relative to the consensus ancestral sequence, P323L, was observed with  
135 frequency >99% and a lineage defining Nsp12 substitution for all 11 analyzed variants. The  
136 Delta variant contained one additional lineage-defining amino acid change in Nsp12, G671S,

137 which was observed in 97.8% of Delta isolates. No other substitutions were found with a  
138 frequency of  $\geq 50\%$  in any of the variants.

139 Given the recent emergence and high prevalence of the Omicron variant, amino acid  
140 substitutions in Nsp12 of Omicron variant were further investigated with a more sensitive  
141 frequency cutoff of 0.5%. Among the 6 substitutions (Table 2), P323L and F694Y were the most  
142 frequently observed, in 99.5% and 2.0% of Omicron sequences, respectively, while all 4  
143 remaining substitutions had frequencies of  $\leq 1\%$ . In the initial Omicron wave (December 13,  
144 2021), F694Y was highly prevalent (41.1% of worldwide isolates and 94.1% of the UK isolates)  
145 in sequences submitted to the GISAID database; however, as the Omicron variant continued to  
146 spread, the G694Y substitution rapidly declined in frequency with only 2.00% of deposited  
147 sequences harboring the substitution as of January 18, 2022 (Supplemental Fig. 2). Interestingly,  
148 F694Y is not unique to the Omicron variant as it was also found in 4.9% of Delta variant  
149 sequences (Supplemental Table 2).

150 Most notably, Nsp12 substitutions previously identified to reduce *in vitro* susceptibility to RDV  
151 (19, 35), F480L, V557L, and E802D, were rarely found in our evaluation. Of the 5,842,948  
152 variant sequences evaluated, F480L, V557L, and E802D were only observed in 16 (0.0002%),  
153 24 (0.0004%), and 102 (0.002%) sequences, respectively. Further, only 49 (0.0008%) variant  
154 sequences had any alteration at the residue involved in RDV induced delayed chain termination,  
155 S861 (14).

### 156 ***Structural analysis of Nsp12 substitutions observed in variants***

157 RDV acts by incorporating its triphosphate metabolite (RDV-TP) into the viral RNA and  
158 subsequently causing clashes with the Nsp12 protein at multiple location, compromising further  
159 synthesis (14, 15). Analogs of RDV that produce the same RDV-TP active metabolite, such as

160 GS-441524, exert their inhibitory activity via the same mechanism of action. At present, a  
161 structure of the pre-incorporated state of RDV-TP in the RdRp active site is still unavailable. We  
162 built a model, described previously (14, 15, 36), based on an existing structure of the polymerase  
163 complex (Nsp12/(Nsp8)<sub>2</sub>/Nsp7/(Nsp13)<sub>2</sub>) with primer and template RNA (PDB: 6XEZ) (37).  
164 Using this model, we assessed the potential impact of each Nsp12 amino acid substitution  
165 identified in the analyzed variants on the affinity of RDV-TP for the RdRp active site.  
166 As seen in Fig. 2, the two most common amino acid substitutions, P323L, seen in all variants,  
167 and G671S, observed in Delta, are 28.6 Å and 24.9 Å, respectively, from the pre-incorporated  
168 RDV-TP (measured from the amino acid C $\alpha$  to RDV-TP's C1'). Of all the low-frequency  
169 substitutions identified, only F694Y, found in 2-5% of Omicron and Delta isolates, is in close  
170 proximity to the RdRp active site. Measured to be 12.2 Å from the RDV-TP, the residue is not in  
171 direct contact with the inhibitor but is close enough to have an indirect conformational effect.  
172 However, an evaluation of its impact on RDV-TP binding affinity using a molecular mechanics  
173 generalized Born surface area (MM-GBSA) approach resulted in no meaningful difference,  
174 likely because of the relatively conservative change from phenylalanine to tyrosine (38).  
175 Most low-frequency amino acid substitutions in Omicron and other variants occur on the surface  
176 of Nsp12, away from the polymerase active site (Supplemental Figs. 3 and 4). While the  
177 dynamics of incorporation and RDV-TP inhibition are complex events, this structural analysis  
178 suggests little reason to expect a significant impact on the efficacy of RDV and GS-441524.

179 ***Potency against recombinant SARS-CoV-2 expressing the prevalent variant amino acid***  
180 ***substitutions***

181 The Omicron clinical isolate evaluated did not contain the Nsp12 F694Y substitution found at  
182 high frequency in early UK Omicron isolates (Supplemental Fig. 2). Due to the initial prevalence



183 in Omicron variants and proximity to the RdRp active site, we sought to assess RDV and GS-  
184 441524 activity against recombinant Omicron (rOmicron) viruses with and without the Nsp12  
185 F694Y substitution. By ELISA, the RDV  $EC_{50}$  values were  $46 \pm 6$  nM and  $34 \pm 3$  nM (Table 3  
186 and Fig. 3) against rOmicron and rOmicron F694Y, respectively. Similarly, potency was  
187 preserved for GS-441524 against both recombinant viruses, with  $EC_{50}$  values of  $2600 \pm 100$  nM  
188 (rOmicron) and  $2200 \pm 300$  nM (rOmicronF694Y). RDV and GS-441524 were similarly potent  
189 against the two recombinant Omicron viruses and an Omicron clinical isolate run in parallel,  
190 with all three viruses showing increased susceptibility to both RDV and GS-441524 compared to  
191 the WA1 isolate by ELISA (Table 3 and Fig. 3).

192 We next sought to evaluate the *in vitro* potency of RDV and GS-441524 against other Nsp12  
193 amino acid substitutions alone or in combination that were identified at high frequency (>15%)  
194 in any specific variant. Recombinant SARS-CoV-2 WA1 viruses containing a Nano luciferase  
195 (Nluc) transgene and the wild-type or mutated nsp12 sequences were rescued and tested for RDV  
196 and GS-441524 susceptibility. Monitoring Nluc signal from infected cells at 48 hpi, we observed  
197 an RDV  $EC_{50}$  value of  $80 \pm 21$  nM for WA1 recombinant virus, while viruses containing either  
198 the P323L substitution alone or the P323L/G671S double substitution found in Delta variant had  
199 RDV  $EC_{50}$  values of  $71 \pm 26$  nM and  $104 \pm 20$  nM, respectively, resulting in a 1.2-fold change or  
200 less relative to WA1 (Table 4, Fig. 4A). Modification of nsp12 with a sequence encoding G671S  
201 alone failed to rescue infectious virus after several independent attempts, a finding which  
202 complements prior evidence suggesting Nsp12 P323L conveys a growth advantage (39).  
203 Recombinant viruses containing either P323L, F694Y, or the P323L/F694Y double substitution  
204 in a WA1 Firefly luciferase (Fluc) recombinant virus background were similarly susceptible to  
205 RDV ( $EC_{50}$  values within 1.2-fold of WA1) (Table 4, Fig. 4B). GS-441524 antiviral potency was

206 also maintained against recombinant SARS-CoV-2 viruses harboring the Nsp12 P323L,  
207 P323L/G671S, and P323L/F694Y substitutions, with fold changes of 0.73 to 1.83 relative to  
208 WA1 (Table 4). Collectively, these data confirm that antiviral potencies of RDV and GS-441524  
209 remain unchanged against viruses harboring the prevalent Nsp12 substitutions currently  
210 identified in isolates of SARS-CoV-2 variants.

211

### 212 **3. Discussion and Conclusions**

213 Over the past 2 years of the SARS-CoV-2 pandemic, the rapid evolution of the virus has led to  
214 the emergence of multiple viral variants. Since the beginning of pandemic, WHO declared 5 of  
215 these variants as VOCs that could be associated with more severe disease and/or increased rate  
216 of transmission. While the SARS-CoV-2 antiviral activity of RDV has previously been well  
217 characterized both *in vitro* and *in vivo* (13, 24, 26, 29-31), most studies have been conducted  
218 using the ancestral WA1 isolate. Here, we sought to fully characterize the antiviral potency of  
219 RDV and its parent nucleoside GS-441524 against a panel of the most significant SARS-CoV-2  
220 variants including all the major VOCs. Utilizing PRA and ELISA assays in parallel, we observed  
221 a general agreement in potency between assays with most RDV  $EC_{50}$  values observed near 100  
222 nM, indicating N-protein levels correlated with released infectious virus. Findings from both  
223 assays revealed all variants to have RDV  $EC_{50}$  values within 2.4-fold of WA1. The Iota variant  
224 was the only variant with >2-fold change in potency for RDV compared with WA1 by ELISA.  
225 However, the  $EC_{50}$  against Iota observed by PRA and for GS-441524 ELISA were similar to  
226 WA1 indicating that the Iota variant remains susceptible to RDV and GS-441524. Importantly,  
227 both Delta and Omicron variants, the two most recent strains in predominant circulation with  
228 increased severity and elevated transmission, respectively, are highly susceptible to both RDV

229 and GS-441524. Interestingly, Omicron is significantly more susceptible to RDV and GS-  
230 441524, though the reasons for this are not understood, as there are no substitutions in Nsp12  
231 that would predict increased potency.

232 The potency observed for the GS-441524 parent nucleoside against all variants was 20-75 times  
233 lower than for RDV, consistent with previous findings in A549 cells (13). As observed with  
234 RDV, GS-441524 maintained potency against all clinical isolates of variants tested, with a  
235 maximum fold change of 1.4 compared with WA1. Although the active triphosphate for GS-  
236 441524 and RDV are identical, it was important to confirm pan-variant GS-441524 potency  
237 because orally bioavailable prodrug options for delivery of GS-441524 are under exploration  
238 (40, 41).

239 The sequence analysis presented here and by others (22, 42) have found the nsp12 gene,  
240 encoding the RNA dependent RNA polymerase, of variants to be remarkably stable over the last  
241 2 years. Only two substitutions, P323L (among all variants) and G671S (in the Delta variant)  
242 have an observed prevalence >15% among sequenced variant isolates (Supplemental Table 2). In  
243 contrast, multiple substitutions in the spike protein have been observed in all variants  
244 (Supplemental Figure 1 and Supplemental Table 3), which can result in immune evasion and  
245 reduced efficacy of monoclonal antibodies (43, 44). Structural analysis of the P323L, G671S,  
246 and F694Y (a highly prevalent substitution in early Omicron isolates) found each of these  
247 substitutions to be unlikely to reduce susceptibility to RDV. We confirmed RDV and GS-441524  
248 retained antiviral activity against recombinant viruses containing each of these substitutions  
249 individually or in combinations. The findings were consistent with antiviral assessments  
250 performed in clinically isolated variants containing these Nsp12 substitutions, in which RDV and

251 GS-441524 have similar potencies to WA1. Therefore, future variants containing P323L, G671S,  
252 F694Y, or their combinations are likely to remain susceptible to RDV and GS-441524.

253 Nsp12 mutations selected through in vitro passaging that are known to confer RDV resistance in  
254 coronaviruses (19, 35) are noticeably lacking from the sequence analysis of clinical samples.  
255 These mutations were observed in <0.001% of sequences analyzed, indicating that despite the  
256 widely prevalent use of RDV to treat COVID-19 in >10 million hospitalized patients over the  
257 course of the pandemic, emergence of RDV-resistant viruses is rare (42). However, with the  
258 recent expansion of RDV indication to treat COVID-19 earlier in the course of viral infection  
259 through outpatient use (11, 12) or potential future use of orally bioavailable prodrugs of GS-  
260 441524, a sustained surveillance for emergence of resistance will need to continue.

261 In summary, we confirmed in several assay systems that past and present SARS-CoV-2 VOCs  
262 and VOIs retain *in vitro* susceptibility to both RDV and its parent nucleoside GS-441524. These  
263 findings highlight that both RDV and GS-441524 exhibit pan-variant SARS-CoV-2 activity and  
264 support the continued clinical use of RDV in approved patient populations.

#### 265 **4. Materials and Methods**

##### 266 ***Reagents***

267 Remdesivir (RDV) and GS-441524 were synthesized at Gilead Sciences, Inc. Validation of  
268 chemical identities were determined by NMR and LCMS, purity >95% was assessed by HPLC  
269 (7, 18). Compounds were solubilized in 100% dimethyl sulfoxide (DMSO) at a concentration of  
270 10 mM.

271 *Viruses and cells*

272 Vero-TMPRSS2 cells expressing human transmembrane serine protease 2 (hTMPRSS2) (45)  
273 were purchased from JCRB cell bank (Cat # JCRB 1818), National Institutes of Biomedical  
274 Innovation, Health and Nutrition. A549-ACE2 cells that stably express human angiotensin-  
275 converting enzyme 2 (hACE2) were established and provided by the University of Texas  
276 Medical Branch (46). A549-ACE2-TMPRSS2 (Cat # a549-hace2tpsa) were purchased from  
277 InvivoGen (San Diego, CA). All cells were maintained at 37°C and 5% CO<sub>2</sub> in Dulbecco's  
278 Minimum Essential Medium (DMEM) with GlutaMAX (Gibco cat # 10569-010) supplemented  
279 with 10% heat-inactivated fetal bovine serum (FBS) (Hyclone Cat # SH30396.03), 100 units/mL  
280 penicillin, 100 µg/mL streptomycin (Gibco Cat # 15140-122), and the appropriate selection  
281 agents – 1 mg/mL Geneticin (Vero-TMPRSS2), 10 µg/mL Blasticidin (A549-ACE2), or 0.5  
282 µg/mL Puromycin and 100 µg/mL Hygromycin B (A549-ACE2-TMPRSS2). All cells were  
283 passaged 2-3 times per week with 0.25% Trypsin/0.02% EDTA (Gibco Cat#25200056). Cells  
284 used in all experimental set-ups were between passage 5 and 30.

285 SARS-CoV-2 isolates (Supplemental Table 1) were acquired through the World Reference  
286 Center for Emerging Viruses and Arboviruses at the University of Texas Medical Branch (Delta  
287 and Epsilon) and BEI Resources, National Institute of Allergy and Infectious Diseases (NIAID),  
288 National Institutes of Health (NIH). Isolates obtained from BEI Resources were deposited by the  
289 CDC (WA1 reference and Lambda), Bassam Hallis (Alpha), Alex Sigal and Tulio de Oliveira  
290 (Beta), the National Institute of Infectious Diseases (Gamma), Andrew S. Pekosz (Omicron and  
291 Zeta), Dr. Mehul Suthar and Dr. Benjamin Pinsky (Kappa), and Dr. David D. Ho (Iota).

292 All viruses were propagated 1-2 times in Vero-TMPRSS2 cells as follows.  $1 \times 10^7$  Vero-  
293 TMPRSS2 cells were seeded into a T225 flask in Vero-TMPRSS2 maintenance media and

294 incubated overnight at 37°C + 5% CO<sub>2</sub>. The following day, the media was aspirated and replaced  
295 with 25 mL of DMEM supplemented with 2% FBS (infection medium) and infected with 10 µL  
296 of P0 stocks. The flasks were returned to 37°C + 5% CO<sub>2</sub> until only 10-20% of viable cells  
297 remained (typically 36-72 hpi). The supernatant was harvested into a 50 mL Falcon tube and  
298 centrifuged at 2000 × g for 5 minutes to pellet cellular debris. The clarified supernatant was then  
299 transferred to a clean falcon tube and aliquoted as a working P1 stock into 100-250 µL aliquots  
300 and frozen at -80°C. The titer of the P1 stock was determined by plaque formation assay (PFA).  
301 If a second passage was required, the procedure above was repeated using the P1 stock to  
302 inoculate.

### 303 ***Plaque formation assay (PFA)***

304 3×10<sup>5</sup> Vero-TMPRSS2 cells/well were seeded into 12-well plates in 1 mL of maintenance media  
305 and incubated overnight at 37°C and 5% CO<sub>2</sub>. The following day, cell confluency was confirmed  
306 to be >95% by visualization under a light microscope. Samples for analysis were serially diluted  
307 10-fold in infection medium (DMEM + 2% FBS) up to a final dilution of 10<sup>-5</sup> or 10<sup>-6</sup>. Spent  
308 supernatant was aspirated and replaced with 100 µL of serially diluted inoculum/well, and  
309 culture plates were returned to the incubator for 1 h with gentle rocking every 15 min. Following  
310 incubation, 2 mL of pre-warmed overlay medium (DMEM with 2% FBS, 1X  
311 penicillin/streptomycin, and 1.5% carboxymethylcellulose) was added to each well. Cells were  
312 then incubated without agitation for 3 days, at which point 2 mL of crystal violet fix/stain  
313 solution was added to each well. Cells were incubated at room temperature overnight.  
314 Supernatants containing the crystal violet solution were discarded, and wells were washed with  
315 water 2 to 4 times each until plaques were visible and washes were clear of crystal violet residue.

316 Plaques were counted manually from the most dilute wells consistently containing >5 plaque  
317 forming units (PFU).

### 318 ***Plaque-reduction assay (PRA)***

319  $5 \times 10^4$  A549-ACE2-TMPRSS2 cells were suspended into 500  $\mu$ L maintenance medium and  
320 seeded into each well of a 48-well plate (Corning). Plates were incubated at 37°C with 5% CO<sub>2</sub>  
321 overnight, after which the medium was aspirated and 250  $\mu$ L of infection medium (DMEM + 2%  
322 FBS) was added to each well. Serial 3-fold dilutions of RDV in DMSO were added to each well  
323 using a Tecan D300e digital liquid dispenser. The DMSO concentrations were normalized to that  
324 of the highest compound concentration (DMSO less than <0.1% in final solution). SARS-CoV-2  
325 was diluted into infection medium to  $1 \times 10^5$  PFU/mL, and 50  $\mu$ L of inoculum was added to each  
326 well to result in a multiplicity of infection (MOI) = 0.1. At 48 or 72 hpi (for Omicron and 72 hpi  
327 WA1 reference), the supernatant was transferred to a clean 48-well plate and the plate sealed and  
328 frozen at -80°C until ready for analysis using the PFA assay described above. PFU counts for  
329 each variant were normalized to the DMSO controls for each variant (DMSO average = 0%  
330 inhibition). Due to the cumbersome nature of the PRA, all variants could not be read-out  
331 simultaneously; therefore, fold change calculations for this assay were assessed by taking the  
332 average EC<sub>50</sub> for each variant divided by the average EC<sub>50</sub> of the WA1 reference.

### 333 ***Nucleoprotein ELISA***

334  $3 \times 10^4$  A549-ACE2-TMPRSS2 cells in 100  $\mu$ L DMEM (supplemented with 10% FBS and 1X  
335 penicillin/streptomycin) were seeded into each well of a 96-well plate and incubated overnight.  
336 The following day, media was aspirated and 100  $\mu$ L of DMEM containing 2% FBS was added to  
337 each well. Three-fold serial dilutions of RDV or GS-441524 (in triplicate) were added to each

338 well using a HP D300e digital dispenser with a final volume of 200  $\mu$ L/well. Immediately after  
339 compound addition, cells were infected with  $1.5 \times 10^3$  PFU of the relevant SARS-CoV-2 variant  
340 diluted in 100  $\mu$ L of DMEM supplemented with 2% FBS, resulting in a MOI = 0.05. Plates were  
341 centrifuged for 1 min at  $500 \times g$  and then incubated at 37°C with 5% CO<sub>2</sub> for 2 days (or 3 days  
342 for Omicron strains and 72 hpi WA1 reference), after which media was aspirated, and cells fixed  
343 with 100% methanol for 10 minutes at room temperature (RT). The methanol was removed, and  
344 plates air-dried for 10 minutes at RT followed by a 1 h incubation with 100  $\mu$ L/well of blocking  
345 buffer (phosphate-buffered saline [PBS] with 10% FBS, 5% non-fat dry milk, and 0.1% Tween  
346 20) for 1 h at 37°C. The blocking buffer was then aspirated and 50  $\mu$ L of a 1:4000 dilution of  
347 rabbit anti-SARS-CoV-2 nucleocapsid (N) antibody (MA536086, Invitrogen) in blocking buffer  
348 was added and incubated for 2 h at 37°C. Plates were washed 4 $\times$  with 200  $\mu$ L/well of PBS  
349 containing 0.1% Tween 20 prior to addition of 50  $\mu$ L/well of horseradish peroxidase (HRP)  
350 conjugated goat-anti-rabbit IgG (GtxRb-003-FHRPX, ImmunoReagents) diluted 1:4000 in  
351 blocking buffer. Plates were again incubated for 1 h at 37°C and then washed 4 $\times$  with 200  $\mu$ L  
352 PBS with 0.1% Tween 20. 100  $\mu$ L TMB reagent (ENN301, Thermo Scientific) was added to  
353 each well and allowed to incubate at RT until visible staining of the positive control wells,  
354 usually 5-10 minutes. The reaction was stopped with addition of 100  $\mu$ L/well of TMB stop  
355 solution (5150-0021 SeraCare). The absorbance was then read at 450 nm using an EnVision  
356 plate reader. Fold change for variants was calculated for each experiment, comparing to the  
357 relevant WA1 reference. Fold change across all experiments was then averaged to obtain final  
358 reported values.



### 359 ***SARS-CoV-2 sequence analysis***

360 The tabulated amino acid substitutions from WA1 reference (MN985325) for a total of  
361 5,842,948 SARS-Cov-2 genome sequences were obtained from GISAID EpiCov database as of  
362 January 18, 2021 (<https://www.gisaid.org/>) (47). Sequences with length <29,000 nucleotides in  
363 length or that contained >5% of ambiguous bases across genome were excluded from analyses.  
364 The sequences were further categorized into 11 VOC/VOIs according to the PANGO lineage  
365 using Pangolin software (48). The Regeneron COVID-19 Dashboard web portal  
366 (<https://covid19dashboard.regeneron.com>) was used to assess the overall prevalence of mutations  
367 in 7,106,062 unfiltered sequences from GISAID database on January 18, 2022. Lineage-  
368 associated amino acid changes were obtained from PANGO lineage web portal ([https://cov-  
lineages.org/](https://cov-<br/>369 lineages.org/)).

### 370 ***Protein structure modelling and visualization***

371 The model of pre-incorporated RDV-TP in the active site of the SARS-CoV-2 polymerase  
372 complex was developed from the NTP-free cryo-EM structure 6XEZ and has been described  
373 elsewhere (37). The variant mutations P323L, P323L/G671S, and P323L/F694Y were introduced  
374 and optimized by conducting a side chain rotamer optimization and minimization of the mutated  
375 residues and surrounding residues within 5 Å using Prime. The impact of each mutation on the  
376 predicted binding affinity to RDV-TP was assessed with an MM-GBSA residue scan within  
377 Bioluminate.

### 378 ***Site-directed mutagenesis and recombinant virus rescue***

379 To produce recombinant SARS-CoV-2 virus, we utilized a SARS-CoV-2 reverse genetics system  
380 previously described (24, 49) that was slightly modified by fusing plasmids F1-F3 single plasmid

381 making it a 3-plasmid reverse genetics system producing infectious virus containing either Nano  
382 luciferase (Nluc) or the Firefly luciferase (Fluc) transgene. Desired substitutions in nsp12 of the  
383 SARS-CoV-2 genome were added to the nsp12 containing F4 plasmid using the Quick-Change  
384 PCR protocol using Platinum SuperFI II PCR master-mix (ThermoFisher Scientific cat. No.  
385 12361010) following manufacturer's protocols. The primers used to engineer specific mutations  
386 were SARS\_CoV2\_NSP12\_P323L\_Fw-5'-GTTCCCAC**T**TACAAGTTTTG-3' and  
387 SARS\_CoV2\_NSP12\_P323L\_Rv- 5'-CAA**A**ACTTGTA**A**GTGGGAAC-3' for P323L,  
388 SARS\_CoV2\_NSP12\_F694Y\_Fw-5'-GCTAATAGTGTT**T**ATAACATTTGTC-3' and  
389 SARS\_CoV2\_NSP12\_F694Y\_Rv-5'-GACAAATGTTA**T**AAACACTATTAGC-3' for F694Y,  
390 and SARS\_CoV2\_NSP12\_G671S\_Fw-5'-GTCATGTGTGGC**A**GTTCACTATATG-3' and  
391 SARS\_CoV2\_NSP12\_G671S\_Rv-5'-CATATAGTGA**A**CTGCCACACATGAC-3' for G671S.  
392 Substitutions (red highlights in primers) were sequenced confirmed, and then validated plasmids  
393 were digested with either BsaI or Esp3I. Cut plasmids were then ligated together using T4 DNA  
394 ligase, and the ligated product was *in vitro* transcribed into RNA. The RNA products were then  
395 electroporated into Vero-TMPRSS2 cells and monitored until extensive cytopathic effect was  
396 observed and P0 virus harvested. P0 virus stocks were titered and passaged to P1 as described  
397 above for propagation of clinical isolates. Virus used for experiments was either P1 (Fluc) or P2  
398 (Nluc).

### 399 ***Construction of a recombinant Omicron SARS-CoV-2***

400 Recombinant Omicron SARS-CoV-2 was constructed by engineering the complete mutations  
401 from Omicron variant (GISAID EPI\_ISL\_6640916) into an infectious cDNA clone of clinical  
402 isolate USA-WA1/2020 (50). All mutations were introduced into the infectious cDNA clone of  
403 USA-WA1/2020 using PCR-based mutagenesis as previously described (51). An additional

404 recombinant Omicron SARS-CoV-2 was generated bearing the F694Y substitution in NSP12 by  
405 the methods detailed above. rOmicron viruses were analyzed using the N-protein ELISA  
406 following the protocol used for clinical isolates.

#### 407 *Antiviral activity assessment from recombinant luciferase containing viruses*

408 For Nluc readouts,  $1.2 \times 10^4$  A549-hACE2 cells per well were suspended in 50  $\mu$ L infection  
409 medium and seeded into a white clear-bottom 96-well plate (Corning) and incubated overnight at  
410 37°C with 5% CO<sub>2</sub>. On the following day, compounds were added directly to cultures as 3-fold  
411 serial dilutions with a Tecan D300e digital liquid dispenser, with DMSO volumes normalized to  
412 that of the highest compound concentration (final DMSO concentration <0.1%). SARS-CoV-2-  
413 Nluc viruses were diluted to MOI = 0.05 and aliquoted 50  $\mu$ L/well. At 48 hpi, 75  $\mu$ L Nluc  
414 substrate solution (Promega) was added to each well. Luciferase signals were measured using an  
415 Envision microplate reader (Perkin Elmer).

416 For Firefly luciferase readouts, the assay set-up was the same as the Nluc assay except cells were  
417 infected with SARS-CoV-2-Fluc viruses at an MOI = 1.0 and at 48 hpi, 100  $\mu$ L One-Glo  
418 luciferase substrate solution (Promega) was added to each well prior to reading the signal on the  
419 Envision plate reader (Perkin Elmer).

#### 420 *EC<sub>50</sub> determinations*

421 The half-maximal effective concentration (EC<sub>50</sub>) is defined as the compound concentration at  
422 which there was a 50% reduction in plaque formation (PRA), luciferase signal, or N-protein  
423 expression (ELISA) relative to infected cells with DMSO alone (0% inhibition) and uninfected  
424 control (100% inhibition). EC<sub>50</sub> values were determined using GraphPad Prism 8.1.2 using non-

425 linear regression curve fits. Constraints were used when required to ensure the bottom or top of  
426 the fit curves were close to 0 and 100, respectively.

## 427 **5. Acknowledgments**

428 Becky Norquist provided comprehensive manuscript writing support. We thank Kenneth S.  
429 Plante, Jessica A. Plante, and David S. Blakeman for coordination of virus stocks from the  
430 World Reference Center for Emerging Viruses and Arboviruses at the University of Texas  
431 Medical Branch. These studies were fully funded by Gilead Sciences, Inc.

## 432 **6. References**

- 433 1. Eckerle LD, Becker MM, Halpin RA, Li K, Venter E, Lu X, Scherbakova S, Graham RL,  
434 Baric RS, Stockwell TB, Spiro DJ, Denison MR. 2010. Infidelity of SARS-CoV Nsp14-  
435 exonuclease mutant virus replication is revealed by complete genome sequencing. *PLoS Pathog*  
436 6:e1000896.
- 437 2. Gribble J, Stevens LJ, Agostini ML, Anderson-Daniels J, Chappell JD, Lu X, Pruijssers AJ,  
438 Routh AL, Denison MR. 2021. The coronavirus proofreading exoribonuclease mediates  
439 extensive viral recombination. *PLoS Pathog* 17:e1009226
- 440 3. Washington NL, Gangavarapu K, Zeller M, Bolze A, Cirulli ET, Schiabor Barrett KM, Larsen  
441 BB, Anderson C, White S, Cassens T, Jacobs S, Levan G, Nguyen J, Ramirez JM 3rd, Rivera-  
442 Garcia C, Sandoval E, Wang X, Wong D, Spencer E, Robles-Sikisaka R, Kurzban E, Hughes  
443 LD, Deng X, Wang C, Servellita V, Valentine H, De Hoff P, Seaver P, Sathe S, Gietzen K,  
444 Sickler B, Antico J, Hoon K, Liu J, Harding A, Bakhtar O, Basler T, Austin B, MacCannell D,  
445 Isaksson M, Febbo PG, Becker D, Laurent M, McDonald E, Yeo GW, Knight R, Laurent LC, de  
446 Feo E, Worobey M, Chiu CY, Suchard MA, Lu JT, Lee W, Andersen KG. 2021. Emergence and  
447 rapid transmission of SARS-CoV-2 B.1.1.7 in the United States. *Cell* 184:2587-2594.e7.
- 448 4. Mishra S, Mindermann S, Sharma M, Whittaker C, Mellan TA, Wilton T, Klapsa D, Mate R,  
449 Fritzsche M, Zambon M, Ahuja J, Howes A, Miscouridou X, Nason GP, Ratmann O, Semenova  
450 E, Leech G, Sandkühler JF, Rogers-Smith C, Vollmer M, Unwin HJT, Gal Y, Chand M, Gandy  
451 A, Martin J, Volz E, Ferguson NM, Bhatt S, Brauner JM, Flaxman S; COVID-19 Genomics UK  
452 (COG-UK) Consortium. 2021. Changing composition of SARS-CoV-2 lineages and rise of Delta  
453 variant in England. *EClinicalMedicine* 39:101064.
- 454 5. Sah P, Vilches TN, Shoukat A, Fitzpatrick MC, Pandey A, Singer BH, Moghadas SM,  
455 Galvani AP. 2021. Quantifying the potential dominance of immune-evading SARS-CoV-2  
456 variants in the United States. *medRxiv* 2021.05.10.21256996.

- 457 6. European Centre for Disease Prevention and Control (ECDC). 2021. Threat Assessment Brief:  
458 Implications of the emergence and spread of the SARS-CoV-2 B.1.1. 529 variant of concern  
459 (Omicron) for the EU/EEA. 26 Nov 2021.  
460 [https://www.ecdc.europa.eu/sites/default/files/documents/Implications-emergence-spread-SARS-](https://www.ecdc.europa.eu/sites/default/files/documents/Implications-emergence-spread-SARS-CoV-2%20B.1.1.529-variant-concern-Omicron-for-the-EU-EEA-Nov2021.pdf)  
461 [CoV-2%20B.1.1.529-variant-concern-Omicron-for-the-EU-EEA-Nov2021.pdf](https://www.ecdc.europa.eu/sites/default/files/documents/Implications-emergence-spread-SARS-CoV-2%20B.1.1.529-variant-concern-Omicron-for-the-EU-EEA-Nov2021.pdf).
- 462 7. Siegel D, Hui HC, Doerffler E, Clarke MO, Chun K, Zhang L, Neville S, Carra E, Lew W,  
463 Ross B, Wang Q, Wolfe L, Jordan R, Soloveva V, Knox J, Perry J, Perron M, Stray KM,  
464 Barauskas O, Feng JY, Xu Y, Lee G, Rheingold AL, Ray AS, Bannister R, Strickley R,  
465 Swaminathan S, Lee WA, Bavari S, Cihlar T, Lo MK, Warren TK, Mackman RL. 2017.  
466 Discovery and synthesis of a phosphoramidate prodrug of a pyrrolo[2,1-f][triazin-4-amino]  
467 adenine C-nucleoside (GS-5734) for the treatment of Ebola and emerging viruses. *J Med Chem*  
468 60:1648-1661.
- 469 8. Beigel JH, Tomashek KM, Dodd LE, Mehta AK, Zingman BS, Kalil AC, Hohmann E, Chu  
470 HY, Luetkemeyer A, Kline S, Lopez de Castilla D, Finberg RW, Dierberg K, Tapson V, Hsieh L  
471 Patterson TF, Paredes R, Sweeney DA, Short WR, Touloumi G, Lye DC, Ohmagari N, Oh MD,  
472 Ruiz-Palacios GM, Benfield T, Fatkenheuer G, Kortepeter MG, Atmar RL, Creech CB,  
473 Lundgren J, Babiker AG, Pett S, Neaton JD, Burgess TH, Bonnett T, Green M, Makowski M,  
474 Osinusi A, Nayak S, Lane HC, ACTT-1 Study Group Members. 2020. Remdesivir for the  
475 treatment of Covid-19 - Final report. *N Engl J Med* 383:1813-1826.
- 476 9. Goldman JD, Lye DCB, Hui DS, Marks KM, Bruno R, Montejano R, Spinner CD, Galli M,  
477 Ahn MY, Nahass RG, Chen YS, SenGupta D, Hyland RH, Osinusi AO, Cao H, Blair C, Wei X,  
478 Gaggar A, Brainard DM, Towner WJ, Munoz J, Mullane KM, Marty FM, Tashima KT, Diaz G,  
479 Subramanian A, GS-US-540-5773 Investigators. 2020. Remdesivir for 5 or 10 days in patients  
480 with severe Covid-19. *N Engl J Med* 383:1827-1837.
- 481 10. Spinner CD, Gottlieb RL, Criner GJ, Arribas Lopez JR, Cattelan AM, Soriano Viladomiu A,  
482 Ogbuagu O, Malhotra P, Mullane KM, Castagna A, Chai LYA, Roestenberg M, Tsang OTY,  
483 Bernasconi E, Le Turnier P, Chang SC, SenGupta D, Hyland RH, Osinusi AO, Cao H, Blair C,  
484 Wang H, Gaggar A, Brainard DM, McPhail MJ, Bhagani S, Ahn MY, Sanyal AJ, Huhn G, Marty  
485 FM, GS-US-540-5774 Investigators. 2020. Effect of remdesivir vs standard care on clinical  
486 status at 11 days in patients with moderate COVID-19: A randomized clinical trial. *JAMA*  
487 324:1048-1057.
- 488 11. Gottlieb RL, Vaca CE, Paredes R, Mera J, Webb BJ, Perez G, Oguchi G, Ryan P, Nielsen  
489 BU, Brown M, Hidalgo A, Sachdeva Y, Mittal S, Osiyemi O, Skarbinski J, Juneja K, Hyland  
490 RH, Osinusi A, Chen S, Camus G, Abdelghany M, Davies S, Behenna-Renton N, Duff F, Marty  
491 FM, Katz MJ, Ginde AA, Brown SM, Schiffer JT, Hill JA, GS-US-540-9012 (PINETREE)  
492 Investigators. 2022. Early remdesivir to prevent progression to severe Covid-19 in outpatients. *N*  
493 *Engl J Med* 386:305-315.
- 494 12. US Food and Drug Administration (FDA). 2022. FDA News Release: FDA takes actions to  
495 expand use of treatment for outpatients with mild-to-moderate COVID-19.

- 496 [https://www.fda.gov/news-events/press-announcements/fda-takes-actions-expand-use-treatment-](https://www.fda.gov/news-events/press-announcements/fda-takes-actions-expand-use-treatment-outpatients-mild-moderate-covid-19)  
497 [outpatients-mild-moderate-covid-19.](https://www.fda.gov/news-events/press-announcements/fda-takes-actions-expand-use-treatment-outpatients-mild-moderate-covid-19)
- 498 13. Pruijssers AJ, George AS, Schafer A, Leist SR, Gralinski LE, Dinno KH 3rd, Yount BL,  
499 Agostini ML, Stevens LJ, Chappell JD, Lu X, Hughes TM, Gully K, Martinez DR, Brown AJ,  
500 Graham RL, Perry JK, Du Pont V, Pitts J, Ma B, Babusis D, Murakami E, Feng JY, Bilello JP,  
501 Porter DP, Cihlar T, Baric RS, Denison MR, Sheahan TP. 2020. Remdesivir inhibits SARS-  
502 CoV-2 in human lung cells and chimeric SARS-CoV expressing the SARS-CoV-2 RNA  
503 polymerase in mice. *Cell Rep* 32:107940.
- 504 14. Gordon CJ, Tchesnokov EP, Woolner E, Perry JK, Feng JY, Porter DP, Gotte M. 2020.  
505 Remdesivir is a direct-acting antiviral that inhibits RNA-dependent RNA polymerase from  
506 severe acute respiratory syndrome coronavirus 2 with high potency. *J Biol Chem* 295:6785-6797.
- 507 15. Tchesnokov EP, Gordon CJ, Woolner E, Kocinkova D, Perry JK, Feng JY, Porter DP, Gotte  
508 M. 2020. Template-dependent inhibition of coronavirus RNA-dependent RNA polymerase by  
509 remdesivir reveals a second mechanism of action. *J Biol Chem* 295:16156-16165.
- 510 16. Cho A, Saunders OL, Butler T, Zhang L, Xu J, Vela JE, Feng JY, Ray AS, Kim CU. 2012.  
511 Synthesis and antiviral activity of a series of 1'-substituted 4-aza-7,9-dideazaadenosine C-  
512 nucleosides. *Bioorg Med Chem Lett* 22:2705-2707.
- 513 17. Warren TK, Jordan R, Lo MK, Ray AS, Mackman RL, Soloveva V, Siegel D, Perron M,  
514 Bannister R, Hui HC, Larson N, Strickley R, Wells J, Stuthman KS, Van Tongeren SA, Garza  
515 NL, Donnelly G, Shurtleff AC, Retterer CJ, Gharaibeh D, Zamani R, Kenny T, Eaton BP,  
516 Grimes E, Welch LS, Gomba L, Wilhelmsen CL, Nichols DK, Nuss JE, Nagle ER, Kugelman  
517 JR, Palacios G, Doerffler E, Neville S, Carra E, Clarke MO, Zhang L, Lew W, Ross B, Wang Q,  
518 Chun K, Wolfe L, Babusis D, Park Y, Stray KM, Trancheva I, Feng JY, Barauskas O, Xu Y,  
519 Wong P, Braun MR, Flint M, McMullan LK, Chen SS, Fearn R, Swaminathan S, Mayers DL,  
520 Spiropoulou CF, Lee WA, Nichol ST, Cihlar T, Bavari S. 2016. Therapeutic efficacy of the  
521 small molecule GS-5734 against Ebola virus in rhesus monkeys. *Nature* 531:381-385.
- 522 18. Mackman RL, Hu HC, Perron M, Murakami E, Palmiotti C, Lee G, Stray K, Zhang L, Goyal  
523 B, Chun K, Byun D, Siegel D, Simonovich S, Du Pont V, Pitts J, Babusis D, Vijjapurapu A, Lu  
524 X, Kim C, Zhao X, Chan J, Ma B, Lye D, Vandersteen A, Wortman S, Barrett KT, Toteva M,  
525 Jordan R, Subramanian R, Bilello JP, Cihlar T. 2021. Prodrugs of a 1'-CN-4-Aza-7,9-  
526 dideazaadenosine C-nucleoside leading to the discovery of remdesivir (GS-5734) as a potent  
527 inhibitor of respiratory syncytial virus with efficacy in the African green monkey model of RSV.  
528 *J Med Chem* 64:5001-5017.
- 529 19. Agostini ML, Andres EL, Sims AC, Graham RL, Sheahan TP, Lu X, Smith EC, Case JB,  
530 Feng JY, Jordan R, Ray AS, Cihlar T, Siegel D, Mackman RL, Clarke MO, Baric RS, Denison  
531 MR. 2018. Coronavirus susceptibility to the antiviral remdesivir (GS-5734) is mediated by the  
532 viral polymerase and the proofreading exoribonuclease. *mBio* 9:e00221-e00218.
- 533 20. Sheahan TP, Sims AC, Graham RL, Menachery VD, Gralinski LE, Case JB, Leist SR, Pyrc  
534 K, Feng JY, Trancheva I, Bannister R, Park Y, Babusis D, Clarke MO, Mackman RL, Spahn JE,

- 535 Palmiotti CA, Siegel D, Ray AS, Cihlar T, Jordan R, Denison MR, Baric RS. 2017. Broad-  
536 spectrum antiviral GS-5734 inhibits both epidemic and zoonotic coronaviruses. *Sci Transl Med*  
537 9:eaal3653.
- 538 21. Sheahan TP, Sims AC, Zhou S, Graham RL, Pruijssers AJ, Agostini ML, Leist SR, Schafer  
539 A, Dinnon KH 3rd, Stevens LJ, Chappell JD, Lu X, Hughes TM, George AS, Hill CS,  
540 Montgomery, SA, Brown AJ, Bluemling GR, Natchus MG, Saindane M, Kolykhalov AA,  
541 Painter G, Harcourt J, Tamin A, Thornburg NJ, Swanstrom R, Denison MR, Baric RS. 2020. An  
542 orally bioavailable broad-spectrum antiviral inhibits SARS-CoV-2 in human airway epithelial  
543 cell cultures and multiple coronaviruses in mice. *Sci Transl Med* 12:eabb5883.
- 544 22. de Wit E, Feldmann F, Cronin J, Jordan R, Okumura A, Thomas T, Scott D, Cihlar T,  
545 Feldmann H. 2020. Prophylactic and therapeutic remdesivir (GS-5734) treatment in the rhesus  
546 macaque model of MERS-CoV infection. *Proc Natl Acad Sci USA* 117:6771-6776.
- 547 23. Lo MK, Feldmann F, Gary JM, Jordan R, Bannister R, Cronin J, Patel NR, Klana JD, Nichol  
548 ST, Cihlar T, Zaki SR, Feldmann H, Spiropoulou CF, de Wit E. 2019. Remdesivir (GS-5734)  
549 protects African green monkeys from Nipah virus challenge. *Sci Transl Med* 11:eaau9242.
- 550 24 Xie X, Muruato AE, Zhang X, Lokugamage KG, Fontes-Garfias CR, Zou J, Liu J, Ren P,  
551 Balakrishnan M, Cihlar T, Tseng CK, Makino S, Menachery VD, Bilello JP, Shi PY. 2020. A  
552 nanoluciferase SARS-CoV-2 for rapid neutralization testing and screening of anti-infective drugs  
553 for COVID-19. *Nat Commun* 11:5214.
- 554 25. Dai W, Zhang B, Jiang XM, Su H, Li J, Zhao Y, Xie X, Jin Z, Peng J, Liu F, Li C, Li Y, Bai  
555 F, Wang H, Chen X, Cen X, Hu S, Yang X, Wang J, Liu X, Xiao G, Jiang H, Rao Z, Zhang LK,  
556 Xu Y, Yang H, Liu H. 2020. Structure-based design of antiviral drug candidates targeting the  
557 SARS-CoV-2 main protease. *Science* 368:1331-1335.
- 558 26. Do TND, Donckers K, Vangeel L, Chatterjee AK, Gallay PA, Bobardt MD, Bilello JP,  
559 Cihlar T, De Jonghe S, Neyts J, Jochmans D. 2021. A robust SARS-CoV-2 replication model in  
560 primary human epithelial cells at the air liquid interface to assess antiviral agents. *Antiviral Res*  
561 192:105122.
- 562 27. Li Y, Cao L, Li G, Cong F, Li Y, Sun J, Luo Y, Chen G, Li G, Wang P, Xing F, Ji Y, Zhao J,  
563 Zhang Y, Guo D, Zhang X. 2021. Remdesivir metabolite GS-441524 effectively inhibits SARS-  
564 CoV-2 infection in Mouse models. *J Med Chem* Feb 1:acs.jmedchem.0c01929.
- 565 28. Ye ZW, Yuan S, Chan JFW, Zhang AJ, Yu CY, Ong CP. 2021. Beneficial effect of  
566 combinational methylprednisolone and remdesivir in hamster model of SARS-CoV-2 infection.  
567 *Emerg Microbes Infect* 10:291-304.
- 568 29. Martinez DR, Schäfer A, Leist SR, Li D, Gully K, Yount B, Feng JY, Bunyan E, Porter DP,  
569 Cihlar T, Montgomery SA, Haynes BF, Baric RS, Nussenzweig MC, Sheahan TP. 2021.  
570 Prevention and therapy of SARS-CoV-2 and the B.1.351 variant in mice. *Cell Rep* 36:109450.

- 571 30. Williamson BN, Feldmann F, Schwarz B, Meade-White K, Porter DP, Schulz J, van  
572 Doremalen N, Leighton I, Yinda CK, Pérez-Pérez L, Okumura A, Lovaglio J, Hanley PW,  
573 Saturday G, Bosio CM, Anzick S, Barbian K, Cihlar T, Martens C, Scott DP, Munster VJ, de  
574 Wit E. 2020. Clinical benefit of remdesivir in rhesus macaques infected with SARS-CoV-2.  
575 *Nature* 585:273-276.
- 576 31. Vermillion MS, Murakami E, Ma B, Pitts J, Tomkinson A, Rautiola D, Babusis D, Irshad H,  
577 Siegel D, Kim C, Zhao X, Niu C, Yang J, Gigliotti A, Kadrichu N, Bilello JP, Ellis S, Bannister  
578 R, Subramanian R, Smith B, Mackman RL, Lee WA, Kuehl PJ, Hartke J, Tomas Cihlar T, Porter  
579 DP. 2021. Inhaled remdesivir reduces viral burden in a nonhuman primate model of SARS-CoV-  
580 2 infection. *Sci Transl Med* 10.1126/scitranslmed.abl8282
- 581 32. Williamson BN, Pérez-Pérez L, Schwarz B, Feldmann F, Holbrook MG, Singh M, Lye DS,  
582 Babusis D, Subramanian R, Haddock E, Okumura A, Hanley PW, Lovaglio J, Bosio CM, Porter  
583 DP, Cihlar T, Mackman RL, Saturday G, de Wit E. 2022. Subcutaneous remdesivir  
584 administration prevents interstitial pneumonia in rhesus macaques inoculated with SARS-CoV-2.  
585 *Antiviral Res* 198:105246.
- 586 33. Martin R, Li J, Parvangada A, Perry J, Cihlar T, Mo H, Porter D, Svarovskaia E. 2021.  
587 Genetic conservation of SARS-CoV-2 RNA replication complex in globally circulating isolates  
588 and recently emerged variants from humans and minks suggests minimal pre-existing resistance  
589 to remdesivir. *Antivir Res* 188:105033.
- 590 34. Zhao H, Lu L, Peng Z, Chen LL, Meng X, Zhang C, Ip JD, Chan WM, Chu AW, Chan KH,  
591 Jin DY, Chen H, Yuen KY, To KK. 2022. SARS-CoV-2 Omicron variant shows less efficient  
592 replication and fusion activity when compared with Delta variant in TMPRSS2-expressed cells.  
593 *Emerg Microbes Infect* 11:277-283.
- 594 35. Szemiel AM, Merits A, Orton RJ, MacLean OA, Pinto RM, Wickenhagen A, Lieber G,  
595 Turnbull ML, Wang S, Furnon W, Suarez NM, Mair D, da Silva Filipe A, Willett BJ, Wilson SJ,  
596 Patel AH, Thomson EC, Palmarini M, Kohl A, Stewart ME. 2021. In vitro selection of  
597 remdesivir resistance suggests evolutionary predictability of SARS-CoV-2. *PLoS Pathog*  
598 17:e1009929.
- 599 36. Gordon, CJ, Lee, HW, Tchesnokov, EP, Perry, JK, Feng, JY, Bilello, JP, Porter, DP, Götte,  
600 M. 2022. Efficient incorporation and template-dependent polymerase inhibition are major  
601 determinants for the broad-spectrum antiviral activity of remdesivir. *J Biol Chem* 298:101529.
- 602 37. Chen J, Malone B, Llewellyn E, Grasso M, Shelton PMM, Olinares PDB, Maruthi K, Eng  
603 ET, Vatandaslar H, Chait BT, Kapoor TM, Darst SA, Campbell EA. 2020. Structural basis for  
604 helicase-polymerase coupling in the SARS-CoV-2 replication-transcription complex. *Cell*  
605 182:1560-1573.e13.
- 606 38. Beard H, Cholleti A, Pearlman D, Sherman W, Loving KA. 2013. Applying physics-based  
607 scoring to calculate free energies of binding for single amino acid mutations in protein-protein  
608 complexes. *PLoS One* 8:e82849.



- 609 39. Dong X, Goldswain H, Penrice-Randal R, Shawli GT, Prince T, Kavanagh Williamson M,  
610 Randle N, Jones B, Salguero FJ, Tree JA, Hall Y, Hartley C, Erdmann M, Bazire J,  
611 Jearanaiwitayakul T, ISARIC4C Investigators, Semple MG, Openshaw PJM, Baille JK, Emmett  
612 SR, Digard P, Matthews DA, Turtle L, Darby A, Davidson AD, Carroll MW, Hiscox JA. 2021.  
613 Rapid selection of P323L in the SARS-CoV-2 polymerase (NSP12) in humans and non-human  
614 primate models and confers a large plaque phenotype. *bioRxiv* 2021.12.23.474030.
- 615 40. Cox RM, Wolf JD, Lieber CM, Sourimant J, Lin MJ, Babusis D, DuPont V, Chan J, Barrett  
616 KT, Lye D, Kalla R, Chun K, Mackman RL, Ye C, Cihlar T, Martinez-Sobrido L, Greninger AL,  
617 Bilello JP, Plemper RK. 2021. Oral prodrug of remdesivir parent GS-441524 is efficacious  
618 against SARS-CoV-2 in ferrets. *Nat Commun* 12:6415.
- 619 41. Schäfer A, Martinez DR, Won JJ, Moreira FR, Brown AJ, Gully KL, Kalla R, Chun K, Du  
620 Pont V, Babusis D, Tang J, Murakami E, Subramanian R, Barrett KT, Bleier BJ, Bannister R,  
621 Feng JY, Bilello JP, Cihlar T, Mackman RL, Montgomery SA, Baric RS, Sheahan TP. 2021.  
622 Therapeutic efficacy of an oral nucleoside analog of remdesivir against SARS-CoV-2  
623 pathogenesis in mice. *bioRxiv* 2021.09.13.460111.
- 624 42. Focosi D, Maggi F, McConnell S, Casadevall A. 2022. Very low levels of remdesivir  
625 resistance in SARS-COV-2 genomes after 18 months of massive usage during the COVID19  
626 pandemic: A GISAID exploratory analysis. *Antiviral Res* 198:105247.
- 627 43. Cao Y, Wang J, Jian F, Xiao T, Song W, Yisimayi A, Huang W, Li Q, Wang P, An R, Wang  
628 J, Wang Y, Niu X, Yang S, Liang H, Sun H, Li T, Yu Y, Cui Q, Liu S, Yang X, Du S, Zhang Z,  
629 Hao X, Shao F, Jin R, Wang X, Xiao J, Wang Y, Xie XS. 2021. Omicron escapes the majority of  
630 existing SARS-CoV-2 neutralizing antibodies. *Nature* 10.1038/s41586-021-04385-3.
- 631 44. Muik A, Lui BG, Wallisch AK, Bacher M, Mühl J, Reinholz J, Ozhelvaci O, Beckmann N,  
632 Güimil Garcia RC, Poran A, Shpyro S, Finlayson A, Cai H, Yang Q, Swanson KA, Türeci Ö,  
633 Şahin U. 2022. Neutralization of SARS-CoV-2 Omicron by BNT162b2 mRNA vaccine-elicited  
634 human sera. *Science* eabn7591.
- 635 45. Shirogane Y, Takeda M, Iwasaki M, Ishiguro N, Takeuchi H, Nakatsu Y, Tahara M, Kikuta  
636 H, Yanagi Y. 2008. Efficient multiplication of human metapneumovirus in Vero cells expressing  
637 the transmembrane serine protease TMPRSS<sub>2</sub>. *J Virol* 82:8942-8946.
- 638 46. Mossel EC, Huang C, Narayanan K, Makino S, Tesh RB, Peters CJ. 2005. Exogenous ACE2  
639 expression allows refractory cell lines to support severe acute respiratory syndrome coronavirus  
640 replication. *J Virol* 79:3846-3850.
- 641 47. Elbe S, Buckland-Merrett G. 2017. Data, disease and diplomacy: GISAID's innovative  
642 contribution to global health. *Glob Chall* 1:33-46.
- 643 48. O'Toole Á, Scher E, Underwood A, Jackson B, Hill V, McCrone JT, Colquhoun R, Ruis C,  
644 Abu-Dahab K, Taylor B, Yeats C, du Plessis L, Maloney D, Medd N, Attwood SW, Aanensen  
645 DM, Holmes EC, Pybus OG, Rambaut A. 2021. Assignment of epidemiological lineages in an  
646 emerging pandemic using the pangolin tool. *Virus Evol* 7:veab064.

- 647 49. Xie X, Lokugamage KG, Zhang X, Vu MN, Muruato AE, Menachery VD, Shi PY. 2021.  
648 Engineering SARS-CoV-2 using a reverse genetic system. *Nat Protoc* 16:1761-1784.
- 649 50. Xie X, Muruato A, Lokugamage KG, Narayanan K, Zhang X, Zou J, Liu J, Schindewolf C,  
650 Bopp NE, Aguilar PV, Plante KS, Weaver SC, Makino S, LeDuc JW, Menachery VD, Shi PY.  
651 2020. An Infectious cDNA Clone of SARS-CoV-2. *Cell Host Microbe* 27:841-848.e3.
- 652 51. Liu Y, Liu J, Johnson BA, Xia H, Ku Z, Schindewolf C, Widen SG, An Z, Weaver SC,  
653 Menachery VD, Xie X, Shi PY. 2021. Delta spike P681R mutation enhances SARS-CoV-2  
654 fitness over Alpha variant. *bioRxiv* 2021.08.12.456173.
- 655

656 **Tables and Figures**

657 **Table 1. Antiviral activity of RDV and GS-441524 against SARS-CoV-2 variants**

| Variant          | RDV Plaque Reduction Assay (n = 2-4)         |                                   | RDV Nucleoprotein ELISA (n = 4-16)           |                                             | GS-441524 Nucleoprotein ELISA (n = 4-12)     |                                             |
|------------------|----------------------------------------------|-----------------------------------|----------------------------------------------|---------------------------------------------|----------------------------------------------|---------------------------------------------|
|                  | Mean EC <sub>50</sub> ± SD <sup>a</sup> (nM) | Fold Change from WA1 <sup>b</sup> | Mean EC <sub>50</sub> ± SD <sup>a</sup> (nM) | Mean Fold Change ± SD from WA1 <sup>c</sup> | Mean EC <sub>50</sub> ± SD <sup>a</sup> (nM) | Mean Fold Change ± SD from WA1 <sup>c</sup> |
| WA1              | 98 ± 48                                      | 1.0                               | 110 ± 42                                     | 1.0                                         | 5600 ± 4100                                  | 1.0                                         |
| Alpha            | 94 ± 58                                      | 0.96                              | 192 ± 51                                     | 1.58 ± 0.48                                 | 8790 ± 6600                                  | 1.22 ± 0.60                                 |
| Beta             | 61 ± 9                                       | 0.63                              | 141 ± 45                                     | 1.19 ± 0.47                                 | 7570 ± 4400                                  | 1.13 ± 0.56                                 |
| Gamma            | 154 ± 226                                    | 1.6                               | 97 ± 39                                      | 0.82 ± 0.42                                 | 5060 ± 2300                                  | 0.79 ± 0.37                                 |
| Delta            | 31 ± 13                                      | 0.31                              | 70 ± 40                                      | 0.59 ± 0.20                                 | 3260 ± 1300                                  | 0.62 ± 0.24                                 |
| Epsilon          | 65 ± 32                                      | 0.66                              | 210 ± 212                                    | 1.94 ± 1.18                                 | 4050 ± 1700                                  | 1.27 ± 0.53                                 |
| Zeta             | 87 ± 44                                      | 0.89                              | 151 ± 102                                    | 1.17 ± 0.40                                 | 3840 ± 1400                                  | 0.93 ± 0.11                                 |
| Iota             | 59 ± 28                                      | 0.60                              | 258 ± 195 <sup>d</sup>                       | 2.33 ± 0.74                                 | 4710 ± 1600                                  | 1.43 ± 0.28                                 |
| Kappa            | 15 ± 6                                       | 0.15                              | 77 ± 50                                      | 0.63 ± 0.19                                 | 2100 ± 930                                   | 0.53 ± 0.07                                 |
| Lambda           | 94 ± 55                                      | 0.96                              | 175 ± 138                                    | 1.37 ± 0.48                                 | 3890 ± 1600                                  | 0.97 ± 0.10                                 |
| WA1 (72 hpi)     | -                                            | -                                 | 97 ± 15                                      | 1.0                                         | 6240 ± 1300                                  | 1.0                                         |
| Omicron (72 hpi) | -                                            | -                                 | 44 ± 16 <sup>e</sup>                         | 0.45 ± 0.13                                 | 3330 ± 1400 <sup>e</sup>                     | 0.57 ± 0.29                                 |

658 <sup>a</sup> Values are the mean ± standard deviation (SD) of the results of independent experiments (number of replicate  
659 experiments shown).

660 <sup>b</sup> Fold change calculated from the mean values = [Variant mean EC<sub>50</sub>]/[WA1 mean EC<sub>50</sub>]

661 <sup>c</sup> A fold change was calculated for each experiment and a mean fold change ± SD was calculated with these values.

662 <sup>d</sup> Statistically significant increase (p=0.015) in EC<sub>50</sub> value of Iota in the RDV ELISA compared to WA1 reference at  
663 48 hpi by one-way ANOVA with Bonferroni correction for multiple comparisons. All other results for variants at 48  
664 hpi are not statistically different from matching WA1 reference.

665 <sup>e</sup> Statistically significant decrease (p≤0.0001) in EC<sub>50</sub> value of Omicron RDV and GS-441524 ELISA compared to  
666 WA1 reference at 72 hpi by one-way ANOVA with Bonferroni correction for multiple comparisons.

667 **Table 2. Amino acid substitutions in Nsp12 Omicron sequences with frequency  $\geq 0.5\%$**

| <b>Nsp12 Changes from WA1 reference</b> | <b>Frequency in Omicron Sequences, % (N)</b> | <b>Frequency in All Available Sequences, % (N)<sup>a</sup></b> |
|-----------------------------------------|----------------------------------------------|----------------------------------------------------------------|
| P323L                                   | 99.5 (390,020)                               | 98.4 (6,850,250)                                               |
| F694Y                                   | 2.0 (7,822)                                  | 3.0 (205,649)                                                  |
| D153Y                                   | 0.97 (3,820)                                 | 0.10 (6,618)                                                   |
| Q875R                                   | 0.86 (3,352)                                 | 0.06 (4,286)                                                   |
| G44S                                    | 0.59 (2,319)                                 | 0.03 (2,336)                                                   |
| I223V                                   | 0.54 (2,109)                                 | 0.03 (2,333)                                                   |

668 <sup>a</sup> A total of N = 7,106,062 sequences from GISAID on January 18, 2022

669 **Table 3. RDV and GS-441524 potencies against recombinant Omicron SARS-CoV-2**  
670 **viruses**

| Virus            | Mean EC <sub>50</sub> ± SD <sup>a</sup> (nM) |                          |
|------------------|----------------------------------------------|--------------------------|
|                  | RDV (n=2-3)                                  | GS-441524 (n=2-3)        |
| WA1              | 100 ± 15                                     | 5200 ± 700               |
| Omicron          | 54 ± 21 <sup>b</sup>                         | 4000 ± 1500 <sup>b</sup> |
| rOmicron         | 46 ± 6 <sup>b</sup>                          | 2600 ± 100 <sup>b</sup>  |
| rOmicron (F694Y) | 34 ± 3 <sup>b</sup>                          | 2200 ± 300 <sup>b</sup>  |

671 <sup>a</sup> Values are the mean ± standard deviation (SD) of the results of independent experiments (number of replicate  
672 experiments shown).

673 <sup>b</sup> Statistically significant decrease ( $p \leq 0.005$ ) in EC<sub>50</sub> value of Omicron and rOmicron viruses from the WA1  
674 reference at 72 hpi by one-way ANOVA with Bonferroni correction for multiple comparisons. No statistical  
675 differences were observed between any of the Omicron and rOmicron viruses.

676 **Table 4. RDV and GS-441524 potencies against recombinant SARS-CoV-2 harboring**  
 677 **prevalent Nsp12 substitutions**

| <b>Recombinant Virus</b> | <b>RDV (n=2-6)</b>                                    |                                                           | <b>GS-441524 (n=2)</b>                                |                                                           |
|--------------------------|-------------------------------------------------------|-----------------------------------------------------------|-------------------------------------------------------|-----------------------------------------------------------|
|                          | <b>Mean EC<sub>50</sub> ± SD<sup>a</sup><br/>(nM)</b> | <b>Mean Fold<br/>Change ± SD from<br/>WA1<sup>b</sup></b> | <b>Mean EC<sub>50</sub> ± SD<sup>a</sup><br/>(nM)</b> | <b>Mean Fold<br/>Change ± SD from<br/>WA1<sup>b</sup></b> |
| WA1-Nluc                 | 80 ± 21                                               | 1.0                                                       | 1880 ± 40                                             | 1.0                                                       |
| P323L-Nluc               | 71 ± 26                                               | 0.95 ± 0.42                                               | 1580 ± 370                                            | 0.84 ± 0.21                                               |
| P323L/G671S-Nluc         | 104 ± 20                                              | 1.22 ± 0.31                                               | 3450 ± 1400                                           | 1.83 ± 0.71                                               |
| WA1-FLuc                 | 99 ± 2                                                | 1.0                                                       | 2230 ± 380                                            | 1.0                                                       |
| F694Y-FLuc               | 112 ± 2                                               | 1.14 ± .01                                                | 2250 ± 380                                            | 1.04 ± 0.34                                               |
| P323L/F694Y-FLuc         | 63 ± 4                                                | 0.63 ± 0.03                                               | 1620 ± 180                                            | 0.73 ± 0.04                                               |

678 <sup>a</sup> Values are the mean ± standard deviation (SD) of the results of independent experiments (number of replicate  
 679 experiments shown).

680 <sup>b</sup> A fold change was calculated for each experiment and a mean fold change ± SD was calculated with these values  
 681 (number of independent replicate experiments shown).

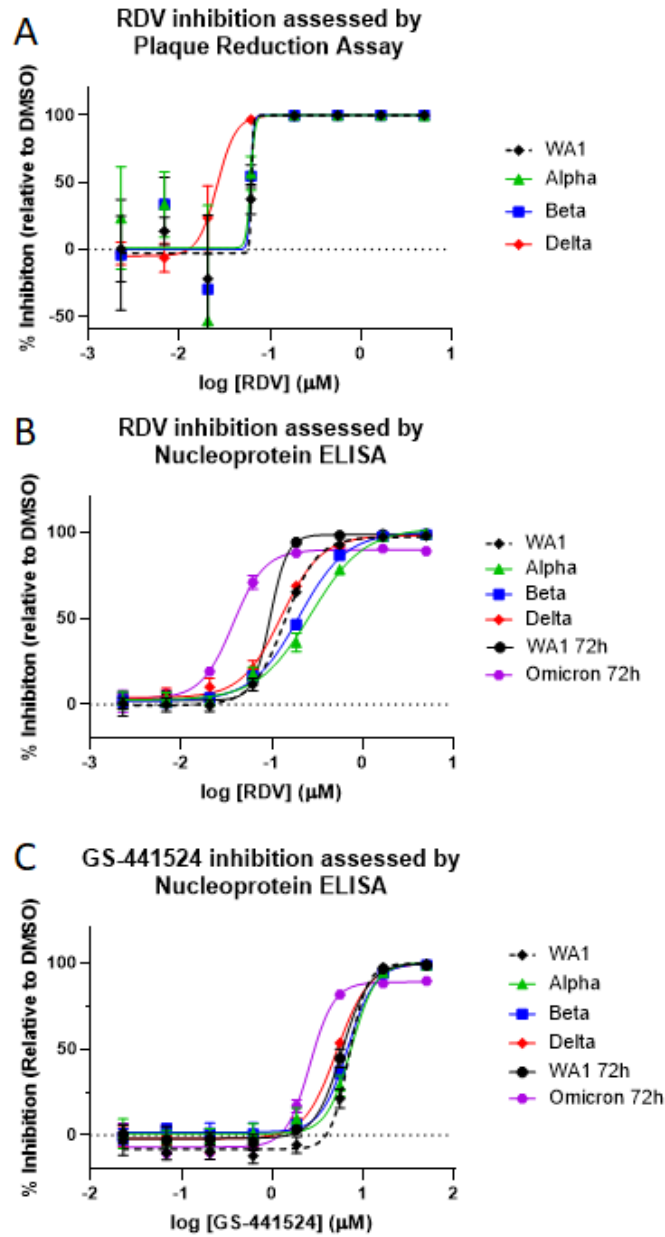

683 **Figure 1. Representative dose-response curves of remdesivir and GS-441524 against SARS-CoV-2**  
684 **VOCs.** Dose-response curves of RDV (A-B) and GS-441524 (C) activity against the WA1 reference and  
685 SARS-CoV-2 VOCs in A549-ACE2-TMPRSS2 cells by plaque reduction assay (PRA) (A) or ELISA (B-  
686 C). In the PRA, infected cell supernatants were harvested at 48 hpi and analyzed by plaque assay on  
687 Vero-TMPRSS2 cells. For ELISA, infected cells were fixed at ~48 hpi (WA1, Alpha, Beta, Delta) or  
688 ~72 hpi (WA1 and Omicron) and processed. Data shown are means and standard deviations from

689 representative experiments that were performed in biological quadruplicate (PRA) or triplicate (ELISA) at  
690 each compound concentration. Average calculated EC<sub>50</sub> values and fold change from WA1 reference can  
691 be found in Table 1.



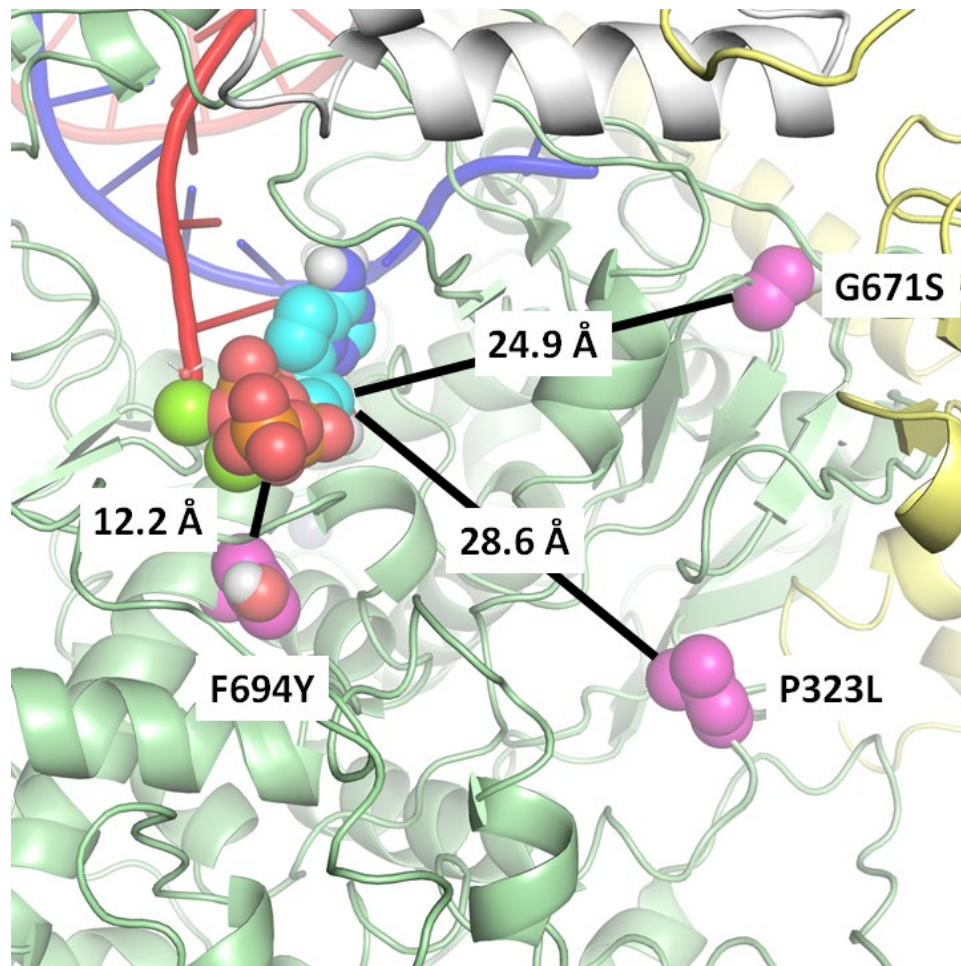

693 **Figure 2. Structural model of Nsp12 highlighting key amino acid substitutions in relation to**  
694 **the active site.** Pre-incorporated remdesivir triphosphate (RDV-TP) was modeled into the cryo-  
695 EM structure of the polymerase complex (6XEZ) (37). The prevalent amino acid substitution  
696 P323L, seen in all variants, is measured to be 28.6 Å from RDV-TP (P323 C $\alpha$  - RDV-TP C1'),  
697 whereas G671S, seen in the Delta variant, is 24.9 Å. Of all the amino acid substitutions reported  
698 here, F694Y, seen at low frequency in Delta and Omicron, comes closest to the active site, at  
699 12.2 Å. A computational analysis suggests that the substitutions have no meaningful impact on  
700 RDV-TP binding affinity.

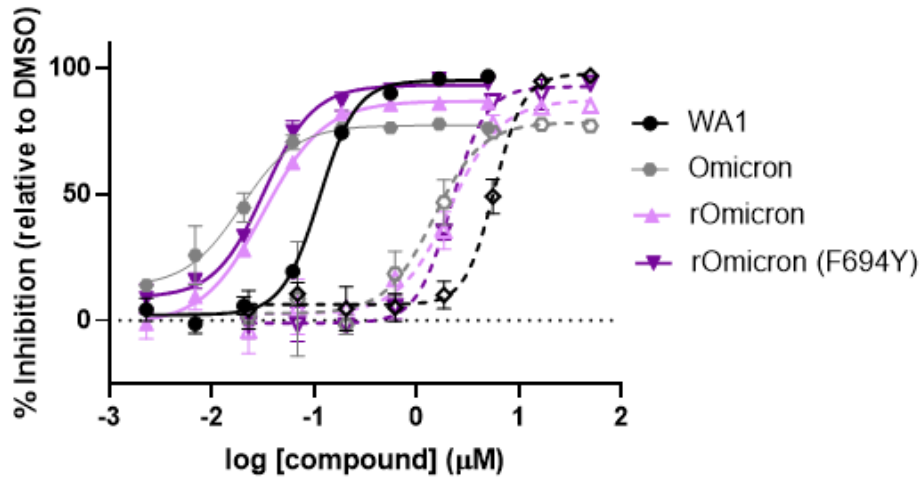

702 **Figure 3. Recombinant Omicron viruses retain susceptibility to RDV and GS-441524.** ELISA dose-  
703 response curves of RDV (solid lines and filled points) and GS-441524 (dashed lines and outlined points)  
704 activity against recombinant Omicron viruses with (dark purple) or without (light purple) the F694Y  
705 substitution compared with WA1 (black), and Omicron (grey) clinical isolates run in parallel. Data shown  
706 are means and standard deviations from a representative 72-hpi nucleoprotein ELISA experiment that was  
707 performed with biological triplicates at each compound concentration. Average calculated  $EC_{50}$  values are  
708 in Table 3.

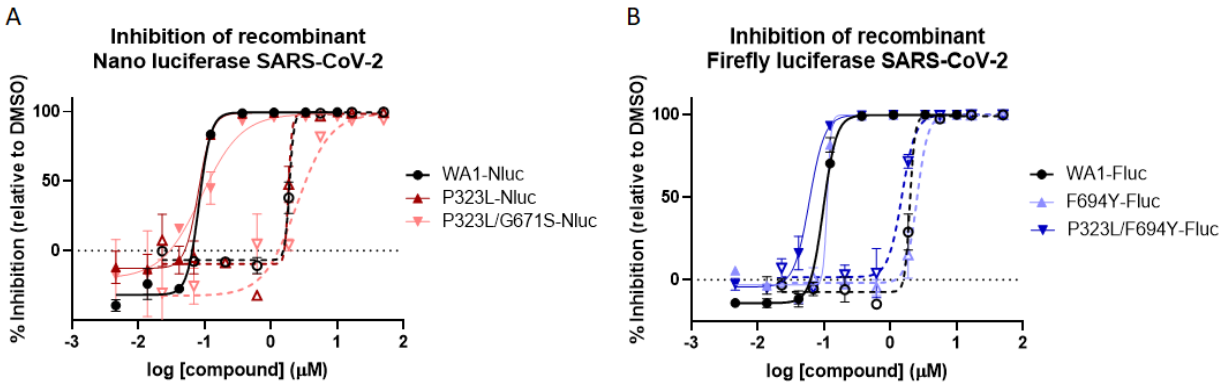

710 **Figure 4. Prevalent Nsp12 substitutions in Delta and Omicron retain susceptibility to RDV and GS-**  
711 **441524.** Dose response curves of RDV (solid lines and filled points) and GS-441524 (dashed lines and  
712 outlined points) activity against recombinant viruses with/without prevalent Nsp12 substitutions  
713 containing a Nano luciferase (Nluc) (A) or Firefly luciferase (Fluc) (B) transgene. Data shown are means  
714 and standard deviations from a representative experiment that was performed in biological duplicates at  
715 each compound concentration. Average calculated  $\text{EC}_{50}$  values and fold change from recombinant WA1  
716 references are in Table 4.

717 **Supplemental Materials**

718

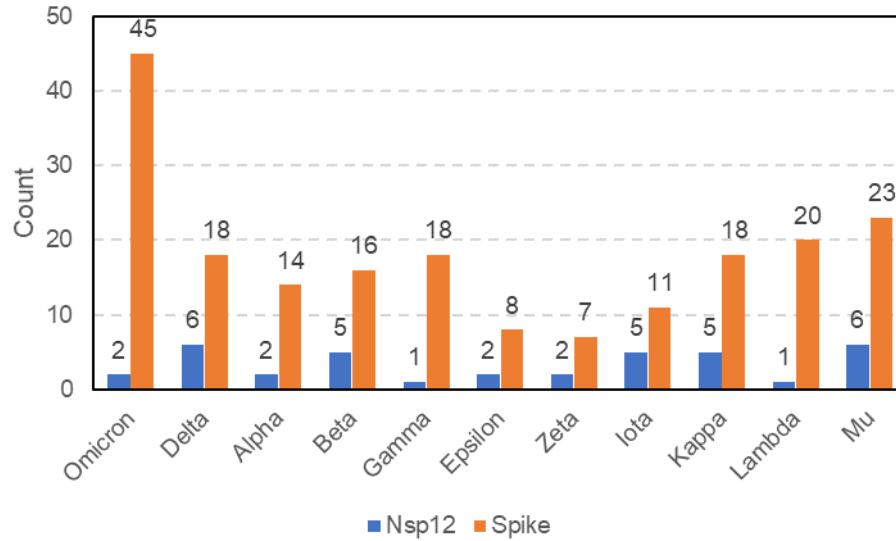

720 **Supplemental Figure 1. Amino acid substitutions in Nsp12 and Spike.** The total number of  
721 amino acid substitutions in Nsp12 compared to Spike from each variant of concern or variant of  
722 interest. Actual substitutions for each variant are found in Supplemental Tables 1 (Nsp12) and 2  
723 (Spike).

724

725

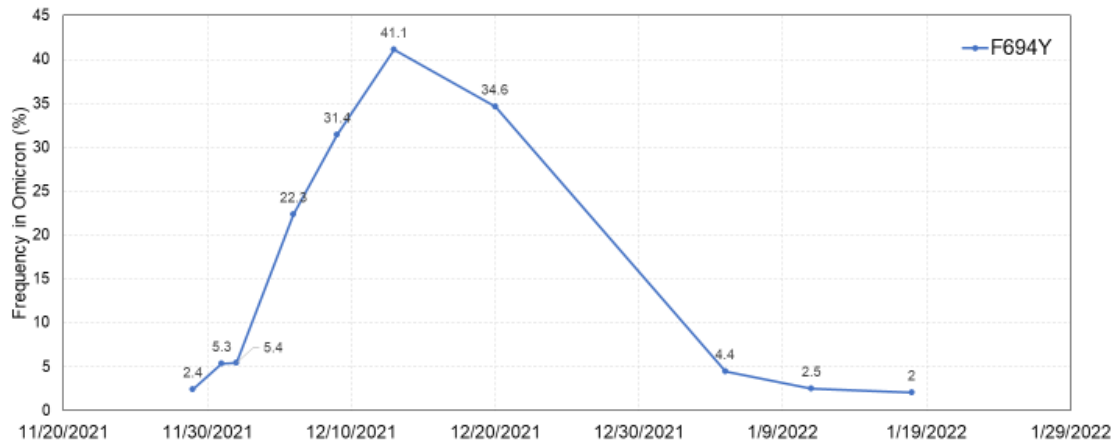

| Date                                          | 11/29/21  | 12/1/21    | 12/2/21    | 12/6/21    | 12/9/21      | 12/13/21     | 12/20/21      | 1/5/22        | 1/11/22       | 1/18/22       |
|-----------------------------------------------|-----------|------------|------------|------------|--------------|--------------|---------------|---------------|---------------|---------------|
| % in Omicron isolates (Total isolates N)      | 2.4 (165) | 5.3 (279)  | 5.4 (298)  | 22.3 (542) | 31.4 (1,127) | 41.1 (2,840) | 34.6 (13,659) | 4.4 (116,830) | 2.5 (248,913) | 2.0 (392,056) |
| % UK isolates with 694Y (Total UK Isolates N) | 100.0 (4) | 100.0 (15) | 100.0 (15) | 95.2 (126) | 93.7 (378)   | 94.1 (1,240) | 45.5 (8,766)  | 6.2 (66,280)  | 4.1 (118,013) | 2.9 (172,297) |

727 **Supplemental Figure 2. F694Y frequency in Omicron variant over time.** Omicron sequences  
 728 were obtained from GISAID at ten different timepoints. Frequency of F694Y in all omicron  
 729 sequences at each timepoint are plotted. The frequency among UK isolates is shown in the data  
 730 table below the plot.

731

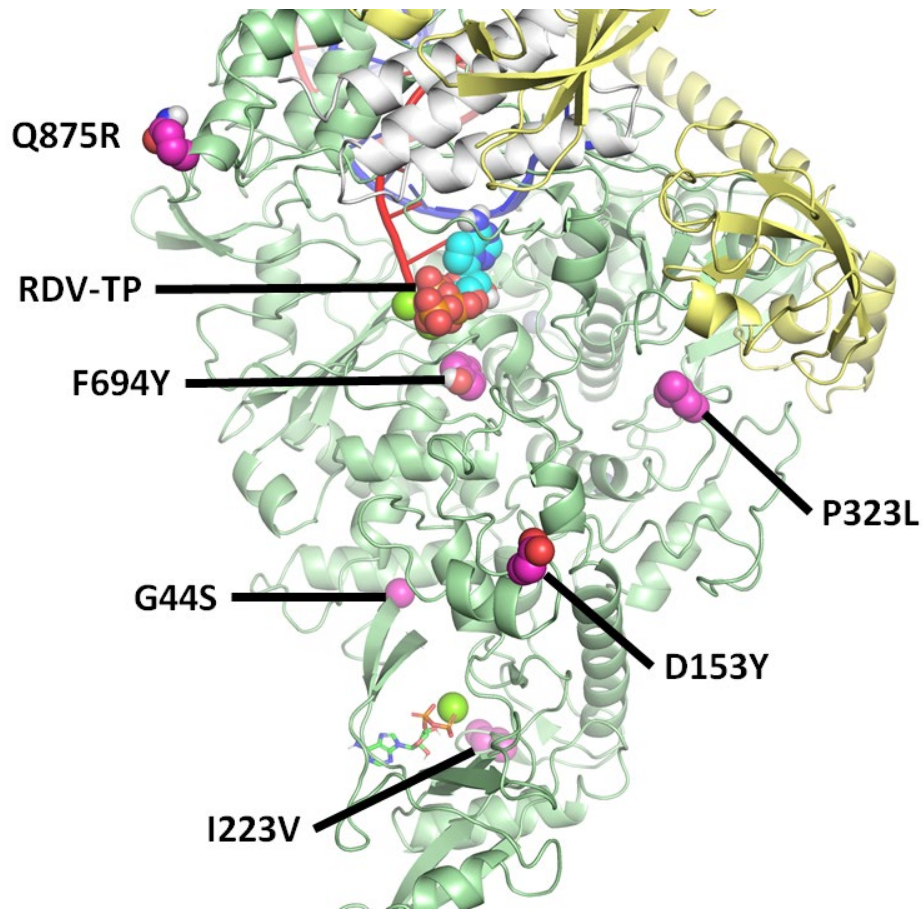

732

733 **Supplemental Figure 3. Location of Omicron Nsp12 amino acid substitutions with**

734 **frequency >0.5%.** Amino acid substitutions identified in Table 2 are mapped onto the model of

735 the polymerase complex with pre-incorporated RDV-TP. All substitutions occur on the surface

736 of Nsp12, away from the active site, apart from F694Y. Nsp12 is shown in green, Nsp8 in

737 yellow, Nsp7 in white, template RNA in blue, and primer RNA in red.

738

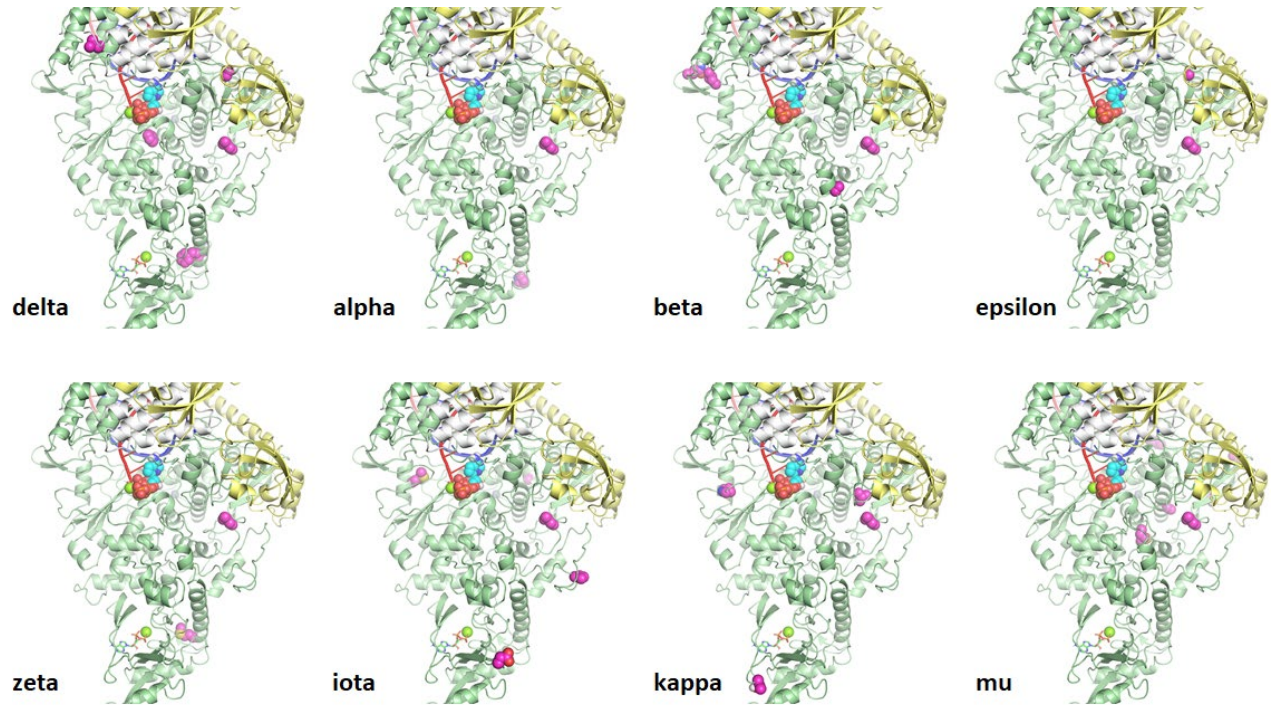

747 **Supplemental Table 1. SARS-CoV-2 variant clinical isolates and sources**

| Variant | Isolate                                 | Lineage   | Source (Cat #) | GISAID ID       | Depositor                                 |
|---------|-----------------------------------------|-----------|----------------|-----------------|-------------------------------------------|
|         | hCoV-19/USA-WA1/2020 (WA1)              | A         | BEI (NR-52281) | EPI_ISL_404895  | Center for Disease Control and Prevention |
| Alpha   | hCoV-19/England/204820464/2020          | B.1.1.7   | BEI (NR-54000) | EPI_ISL_683466  | Bassam Hallis                             |
| Beta    | hCoV-19/South Africa/KRISP-K005325/2020 | B.1.351   | BEI (NR-54009) | EPI_ISL_678615  | Alex Sigal and Tulio de Oliveira          |
| Gamma   | hCoV-19/Japan/TY7-503/2021              | P.1       | BEI (NR-54982) | EPI_ISL_877769  | National Institutes of Infectious Disease |
| Delta   | GNL-1205                                | B.1.617.2 | Source: UTMB   |                 |                                           |
| Epsilon | GNL-354                                 | B.1.429   | Source: UTMB   |                 |                                           |
| Zeta    | hCoV-19/USA/CA/VRLC012/2021             | P.2       | BEI (NR-55439) | EPI_ISL_1364506 | Andrew S. Pekosz                          |
| Iota    | hCoV-19/USA/NY-NP-DOH1/2021             | B.1.526   | BEI (NR-55359) | EPI_ISL_1080761 | David D. Ho (Columbia University)         |
| Kappa   | hCoV-19/USA/CA-Stanford-15_S02/2021     | B.1.617.1 | BEI (NR-55486) | EPI_ISL_1675223 | Dr Mehul Suthar and Dr. Benjamin Pinsky   |
| Lambda  | hCoV-19/Peru/un-CDC-2-4069945/2021      | C.37      | BEI (NR-55654) | EPI_ISL_1591097 | Center for Disease Control and Prevention |
| Omicron | hCoV-19/USA/MD-HP20874/2021             | B.1.1.529 | BEI (NR-56461) | EPI_ISL_7160424 | Andrew S. Pekosz                          |

748



749 **Supplemental Table 2. Amino acid substitutions of Nsp12 in VOC/VOI observed at**  
 750 **frequency  $\geq 1\%$**

| <b>SARS-CoV-2 Variant</b> | <b>SARS-CoV-2 Variant Sequences Analyzed (N, % of Total Sequences)</b> | <b>Nsp12 Substitution</b> | <b>Frequency of Substitution, % (N)</b> |
|---------------------------|------------------------------------------------------------------------|---------------------------|-----------------------------------------|
| Omicron                   | 392,056 (6.7%)                                                         | P323L                     | 99.5 (390,020)                          |
|                           |                                                                        | F694Y                     | 2.0 (7,822)                             |
| Delta                     | 4,059,836 (69.5%)                                                      | P323L                     | 99.4 (4,034,234)                        |
|                           |                                                                        | G671S                     | 97.8 (3,968,940)                        |
|                           |                                                                        | L838I                     | 6.8 (277,419)                           |
|                           |                                                                        | F192V                     | 5.8 (235,631)                           |
|                           |                                                                        | F694Y                     | 4.9 (197,489)                           |
|                           |                                                                        | R197Q                     | 1.2 (47,122)                            |
| Alpha                     | 1,158,351 (19.8%)                                                      | P323L                     | 99.3 (1,149,857)                        |
|                           |                                                                        | P227L                     | 14.2 (164,221)                          |
| Beta                      | 35,180 (0.60%)                                                         | P323L                     | 91.7 (37,661)                           |
|                           |                                                                        | L829F                     | 9.0 (3,712)                             |
|                           |                                                                        | P323H                     | 7.5 (3,075)                             |
|                           |                                                                        | Q822H                     | 5.4 (2,198)                             |
|                           |                                                                        | A176T                     | 2.3 (940)                               |
| Gamma                     | 120,614 (2.1%)                                                         | P323L                     | 99.3 (119,734)                          |
| Epsilon                   | 44,549 (0.76%)                                                         | P323L                     | 94.9 (42,274)                           |
|                           |                                                                        | G671V                     | 2.1 (937)                               |
| Zeta                      | 1,834 (0.03%)                                                          | P323L                     | 98.2 (1,801)                            |
|                           |                                                                        | M196L                     | 1.9 (34)                                |
| Iota                      | 20,923 (0.36%)                                                         | P323L                     | 99.5 (20,821)                           |
|                           |                                                                        | M601I                     | 2.3 (485)                               |
|                           |                                                                        | V257A                     | 2.1 (438)                               |
|                           |                                                                        | D62G                      | 1.2 (244)                               |
|                           |                                                                        | A529V                     | 1.2 (241)                               |
| Kappa                     | 5,498 (0.09%)                                                          | P323L                     | 99.5 (5,472)                            |
|                           |                                                                        | V675I                     | 7.8 (431)                               |
|                           |                                                                        | K478N                     | 7.1 (388)                               |
|                           |                                                                        | T26I                      | 4.0(218)                                |
|                           |                                                                        | P809R                     | 1.6 (88)                                |
| Lambda                    | 6,219 (0.11%)                                                          | P323L                     | 99.8 (6,209)                            |
| Mu                        | 7,888 (0.14%)                                                          | P323L                     | 98.5 (7,771)                            |
|                           |                                                                        | Y521C                     | 21.8 (1,722)                            |
|                           |                                                                        | M629I                     | 9.6 (756)                               |
|                           |                                                                        | T344I                     | 2.3 (181)                               |
|                           |                                                                        | A656S                     | 1.6 (124)                               |
|                           |                                                                        | S364F                     | 1.4 (109)                               |

751

752 **Supplemental Table 3. Amino acid substitutions of Spike in VOC/VOI observed at**  
 753 **frequency  $\geq 1\%$**

| SARS-CoV-2 Variant | SARS-CoV-2 Variant Sequences Analyzed, N (% of Total Sequences) | Spike Substitutions | Frequency of Substitution, % (N) |
|--------------------|-----------------------------------------------------------------|---------------------|----------------------------------|
| Omicron            | 392,056 (6.7)                                                   | D614G               | 99.6 (390,638)                   |
|                    |                                                                 | H655Y               | 99.5 (389,923)                   |
|                    |                                                                 | N679K               | 99.4 (389,751)                   |
|                    |                                                                 | P681H               | 99.4 (389,598)                   |
|                    |                                                                 | N969K               | 98.3 (385,175)                   |
|                    |                                                                 | Q954H               | 98.0 (384,342)                   |
|                    |                                                                 | T547K               | 97.8 (383,385)                   |
|                    |                                                                 | D796Y               | 97.1 (380,607)                   |
|                    |                                                                 | A67V                | 96.9 (379,804)                   |
|                    |                                                                 | L981F               | 96.6 (378,693)                   |
|                    |                                                                 | N856K               | 96.5 (378,369)                   |
|                    |                                                                 | T95I                | 96.0 (376,297)                   |
|                    |                                                                 | HV69_70.del         | 95.1 (372,722)                   |
|                    |                                                                 | G142D               | 95 (372,462)                     |
|                    |                                                                 | YVY144_145.del      | 93.6 (366,879)                   |
|                    |                                                                 | G339D               | 92.2 (361,471)                   |
|                    |                                                                 | Q493R               | 88.3 (346,211)                   |
|                    |                                                                 | T478K               | 88.0 (345,149)                   |
|                    |                                                                 | N501Y               | 87.7 (343,910)                   |
|                    |                                                                 | S477N               | 87.7 (343,796)                   |
|                    |                                                                 | E484A               | 87.5 (343,201)                   |
|                    |                                                                 | Q498R               | 87.4 (342,647)                   |
|                    |                                                                 | Y505H               | 87.3 (342,159)                   |
|                    |                                                                 | G496S               | 86.0 (337,306)                   |
|                    |                                                                 | S375F               | 85.3 (334,245)                   |
|                    |                                                                 | S373P               | 85.2 (334,038)                   |
|                    |                                                                 | N211del             | 84.5 (331,246)                   |
|                    |                                                                 | L212I               | 84.5 (331,183)                   |
|                    |                                                                 | S371L               | 83.3 (326,673)                   |
|                    |                                                                 | ins214EPE           | 79.7 (312,289)                   |
|                    |                                                                 | N764K               | 73.7 (288,937)                   |
|                    |                                                                 | N440K               | 41.8 (163,741)                   |
|                    |                                                                 | G446S               | 41.5 (162,582)                   |
| K417N              | 38.6 (151,376)                                                  |                     |                                  |
| R346K              | 23.6 (92,580)                                                   |                     |                                  |
| A701V              | 13.9 (54,486)                                                   |                     |                                  |
| I1081V             | 4.1 (15,944)                                                    |                     |                                  |
| S371F              | 1.6 (6,166)                                                     |                     |                                  |

|       |                  |               |                  |
|-------|------------------|---------------|------------------|
|       |                  | T19I          | 1.6 (6,106)      |
|       |                  | D405N         | 1.6 (6,076)      |
|       |                  | T376A         | 1.5 (6,044)      |
|       |                  | V213G         | 1.5 (6,004)      |
|       |                  | R408S         | 1.5 (5,968)      |
|       |                  | A27S          | 1.4 (5,305)      |
|       |                  | PPL24_26.del  | 1.4 (5,282)      |
| Delta | 4,059,836 (69.5) | D614G         | 99.7 (4,046,614) |
|       |                  | P681R         | 99.5 (4,038,886) |
|       |                  | T19R          | 98.5 (3,998,522) |
|       |                  | T478K         | 97.4 (3,955,352) |
|       |                  | L452R         | 97.2 (3,944,329) |
|       |                  | D950N         | 95.5 (3,876,829) |
|       |                  | FR157_158.del | 91.9 (3,728,796) |
|       |                  | R158del       | 91.6 (3,718,449) |
|       |                  | G142D         | 65.5 (2,660,026) |
|       |                  | T95I          | 38.5 (1,563,622) |
|       |                  | A222V         | 10.2 (412,176)   |
|       |                  | Y145H         | 3.4 (137,276)    |
|       |                  | V1264L        | 2.5 (102,597)    |
|       |                  | S112L         | 1.8 (71,539)     |
|       |                  | L5F           | 1.4 (57,319)     |
|       |                  | V1104L        | 1.4 (56,592)     |
|       |                  | D950B         | 1.2 (50,256)     |
|       |                  | Q613H         | 1.2 (49,816)     |
| Alpha | 1,158,351 (19.8) | D614G         | 99.6 (1,153,400) |
|       |                  | A570D         | 99.5 (1,152,134) |
|       |                  | P681H         | 99.3 (1,149,903) |
|       |                  | T716I         | 99.0 (1,146,565) |
|       |                  | S982A         | 98.8 (1,143,902) |
|       |                  | D1118H        | 98.7 (1,143,499) |
|       |                  | N501Y         | 97.8 (1,132,631) |
|       |                  | HV69_70.del   | 94.8 (1,098,478) |
|       |                  | Y144del       | 93.9 (1,087,059) |
|       |                  | K1191N        | 3.4 (39,741)     |
|       |                  | L5F           | 3.4 (39,474)     |
|       |                  | S98F          | 1.8 (20,357)     |
|       |                  | W152R         | 1.5 (17,596)     |
|       |                  | D138H         | 1.1 (12,137)     |
| Beta  | 35,180 (0.60)    | D614G         | 99.5 (35,003)    |
|       |                  | A701V         | 99.1 (34,869)    |
|       |                  | D80A          | 93.9 (33,028)    |
|       |                  | K417N         | 92.6 (32,585)    |

|         |               |               |                |
|---------|---------------|---------------|----------------|
|         |               | D215G         | 92.5 (32,557)  |
|         |               | N501Y         | 89.9 (31,628)  |
|         |               | E484K         | 89.4 (31,436)  |
|         |               | LAL242-244del | 83.5 (29,361)  |
|         |               | L18F          | 44.1 (15,521)  |
|         |               | A27S          | 10.8 (3,786)   |
|         |               | T19I          | 2.4 (850)      |
|         |               | P384L         | 1.8 (644)      |
|         |               | L241del       | 1.7 (586)      |
|         |               | A899S         | 1.6 (575)      |
|         |               | L5F           | 1.6 (558)      |
|         |               | A67V          | 1.1 (399)      |
| Gamma   | 120,614 (2.1) | D614G         | 99.5 (119,958) |
|         |               | H655Y         | 98.5 (118,832) |
|         |               | V1176F        | 97.0 (116,930) |
|         |               | T1027I        | 96.9 (116,868) |
|         |               | L18F          | 95.9 (115,714) |
|         |               | P26S          | 95.7 (115,423) |
|         |               | T20N          | 95.4 (115,087) |
|         |               | K417T         | 95.2 (114,812) |
|         |               | N501Y         | 95.1 (114,694) |
|         |               | E484K         | 94.8 (114,366) |
|         |               | D138Y         | 93.7 (112,995) |
|         |               | R190S         | 92.9 (112,060) |
|         |               | P681H         | 5.0 (6,063)    |
|         |               | A688V         | 2.6 (3,160)    |
|         |               | N679K         | 1.6 (1,884)    |
|         |               | S1252F        | 1.4 (1,660)    |
|         |               | Q675H         | 1.1 (1,342)    |
|         |               | H49Y          | 1.0 (1,254)    |
| Epsilon | 44,549 (0.76) | D614G         | 99.8 (44,472)  |
|         |               | L452R         | 97.4 (43,409)  |
|         |               | W152C         | 95.0 (42,311)  |
|         |               | S13I          | 84.0 (37,439)  |
|         |               | W258L         | 8.7 (3,871)    |
|         |               | P26S          | 5.7 (2,517)    |
|         |               | L5F           | 1.8 (819)      |
|         |               | S1252F        | 1.5 (678)      |
| Zeta    | 1,834 (0.03)  | D614G         | 100.0 (1,833)  |
|         |               | V1176F        | 97.7 (1,791)   |
|         |               | E484K         | 94.7 (1,737)   |
|         |               | F565L         | 5.8 (106)      |
|         |               | L5F           | 2.4 (43)       |

|        |               |                     |               |
|--------|---------------|---------------------|---------------|
|        |               | T859I               | 1.0 (19)      |
|        |               | A626S               | 1.0 (19)      |
| Iota   | 20,923 (0.36) | D614G               | 99.7 (20,863) |
|        |               | T95I                | 98.4 (20,582) |
|        |               | D253G               | 97.8 (20,471) |
|        |               | L5F                 | 95.9 (20,073) |
|        |               | A701V               | 63.6 (13,313) |
|        |               | E484K               | 53.3 (11,152) |
|        |               | S477N               | 39.7 (8,314)  |
|        |               | Q957R               | 31.4 (6,570)  |
|        |               | L18F                | 3.5 (733)     |
|        |               | D1260N              | 3.1 (657)     |
|        |               | A845S               | 1.8 (375)     |
| Kappa  | 5,498 (0.09)  | D614G               | 99.8 (5,488)  |
|        |               | P681R               | 99.5 (5,470)  |
|        |               | E484Q               | 95.8 (5,266)  |
|        |               | L452R               | 95.7 (5,263)  |
|        |               | Q1071H              | 72.3 (3,973)  |
|        |               | E154K               | 67.7 (3,721)  |
|        |               | T95I                | 44.2 (2,429)  |
|        |               | G142D               | 43.4 (2,387)  |
|        |               | H1101D              | 32.9 (1,807)  |
|        |               | V382L               | 8.3 (455)     |
|        |               | D1153Y              | 8.1 (444)     |
|        |               | Q218H               | 4 (221)       |
|        |               | V3G                 | 2.1 (113)     |
|        |               | H1101Y              | 1.6 (87)      |
|        |               | Y144del             | 1.5 (81)      |
|        |               | V1264L              | 1.3 (70)      |
|        |               | E1072K              | 1 (55)        |
|        |               | K1073R              | 1 (55)        |
| Lambda | 6,219 (0.11)  | D614G               | 99.9 (6,213)  |
|        |               | T859N               | 99.1 (6,160)  |
|        |               | L452Q               | 98.2 (6,105)  |
|        |               | F490S               | 97.5 (6,063)  |
|        |               | G75V                | 94.4 (5,873)  |
|        |               | T76I                | 94.4 (5,871)  |
|        |               | D253N               | 78.4 (4,878)  |
|        |               | RSYLTPG.246_252.del | 78.2 (4,863)  |
|        |               | Q675H               | 8.6 (534)     |
|        |               | I714V               | 4.6 (283)     |
|        |               | HV69_70del          | 3.5 (216)     |
|        |               | T572I               | 2.8 (173)     |

|    |              |               |              |
|----|--------------|---------------|--------------|
|    |              | L5F           | 2.2 (138)    |
|    |              | T63I          | 2.1 (130)    |
|    |              | G72E          | 1.5 (93)     |
|    |              | Q677H         | 1.5 (91)     |
|    |              | R21I          | 1.4 (88)     |
|    |              | A262S         | 1.4 (84)     |
|    |              | DS.253_254del | 1.1 (66)     |
|    |              | T20I          | 1 (63)       |
| Mu | 7,888 (0.14) | D614G         | 99.8 (7,875) |
|    |              | P681H         | 99.6 (7,855) |
|    |              | R346K         | 99.2 (7,824) |
|    |              | T95I          | 96.2 (7,590) |
|    |              | N501Y         | 96.2 (7,589) |
|    |              | E484K         | 95.8 (7,553) |
|    |              | D950N         | 92.9 (7,324) |
|    |              | Y145N         | 84 (6,627)   |
|    |              | ins143T       | 76.4 (6,026) |
|    |              | Y144S         | 68.3 (5,389) |
|    |              | E583D         | 5.3 (420)    |
|    |              | Y449N         | 5.3 (417)    |
|    |              | K417N         | 5.3 (415)    |
|    |              | D950B         | 4.8 (379)    |
|    |              | Y144T         | 4.8 (375)    |
|    |              | M1229I        | 3.4 (270)    |
|    |              | S939F         | 2.9 (230)    |
|    |              | ins144S       | 2.5 (201)    |
|    |              | Y144del       | 2.4 (193)    |
|    |              | Y144N         | 2.1 (165)    |
|    |              | T572I         | 1.9 (153)    |
|    |              | M1237I        | 1.7 (133)    |
|    |              | L5F           | 1.5 (121)    |

754
